# Supplementary material for: Metabolomic Analysis of the Effect of Lippia origanoides Essential Oil on the Inhibition of Quorum Sensing in Chromobacterium violaceum
Source: MDPI journal article supplement (doi:10.3390/antibiotics12050814), 2023-04-26

## Supplementary Material

### Figure S1.

- A. Aromatic plant cultivation plots at the CENIVAM research centre (Industrial University of Santander, Bucaramanga, Colombia).
- B. Distillation facilities (one of the stainless-steel alembic used in research projects).
- C. Lippia origanoides (Verbenaceae family) plant.
- D. Satureja viminea (Lamiaceae family) plant.



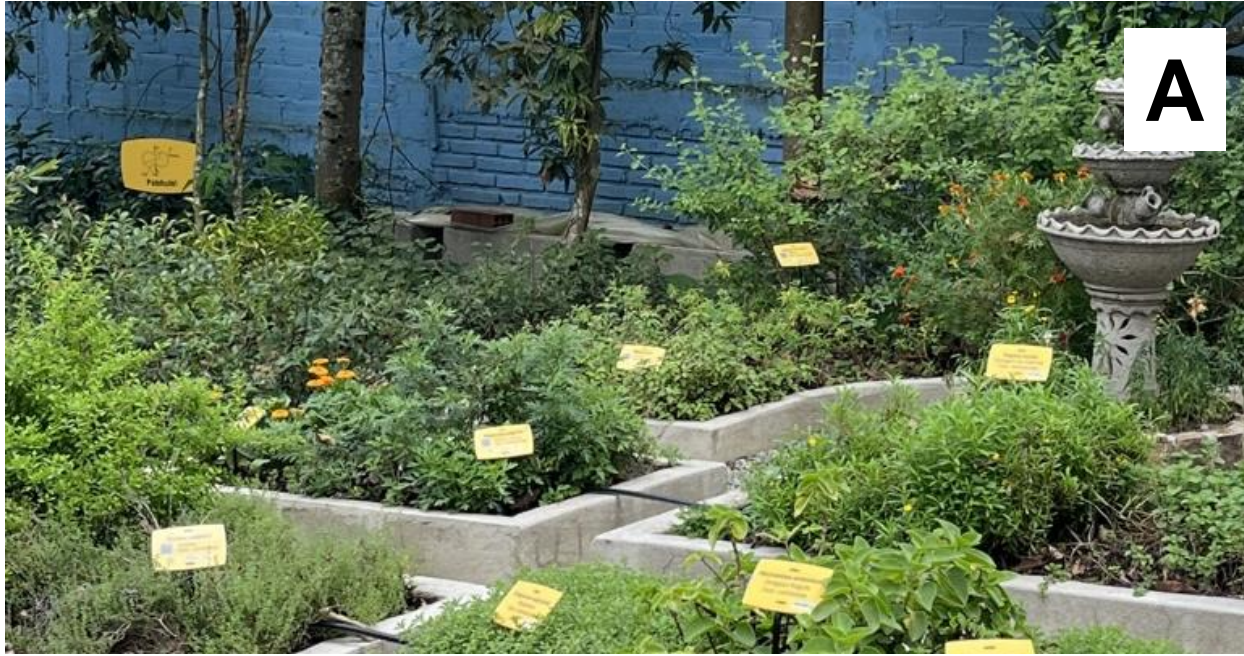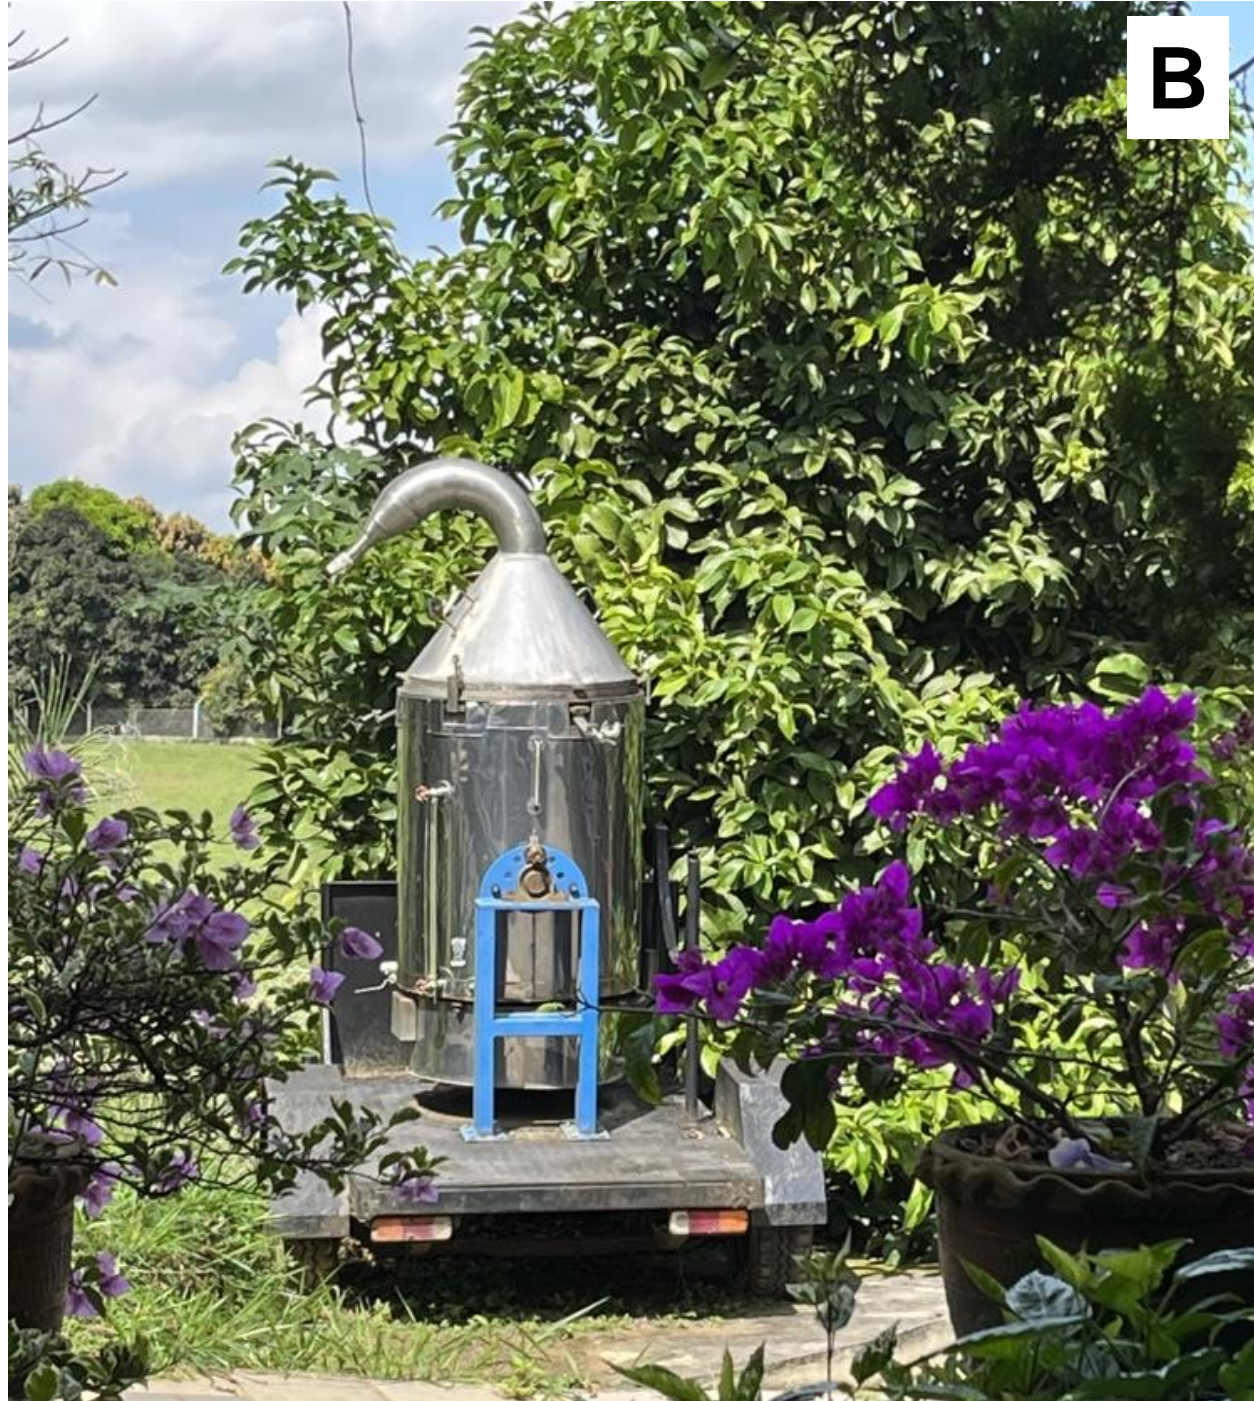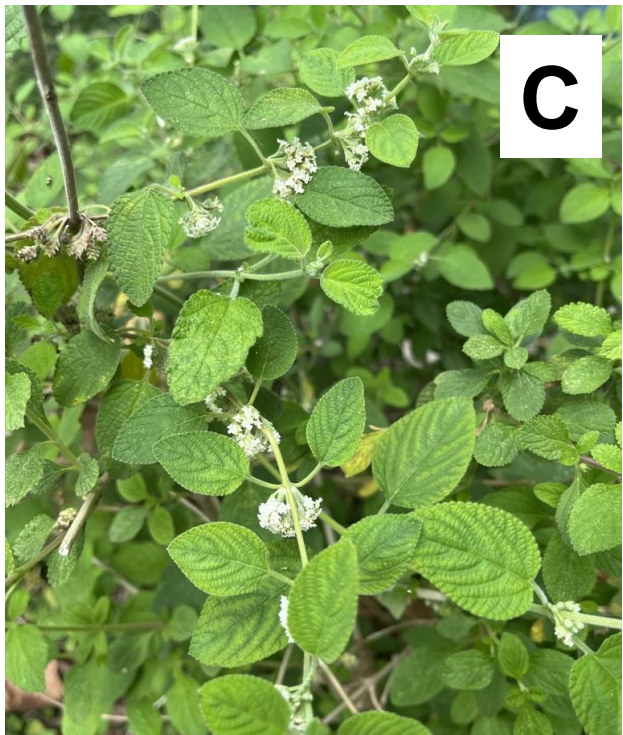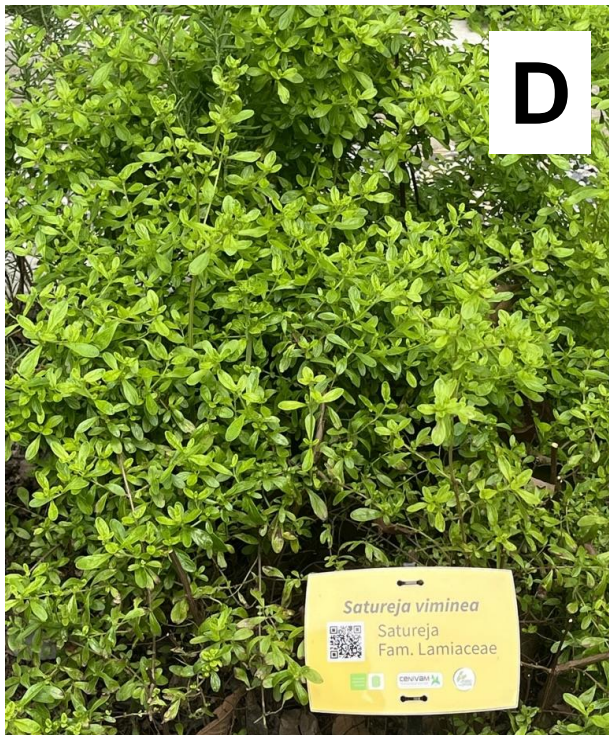



## **Supplementary Material**

### **Figure S2.**

Chromatographic profiles of essential oils distilled from 15 aromatic plants cultivated at the CENIVAM research centre (Industrial University of Santander, Bucaramanga, Colombia). GC/MS, electron ionization (EI, 70 eV). Split 30:1.

***Steiractinia aspera* Cuatrec [SA]**

Asteraceae family

GC/MS, DB-5 Column (60 m)

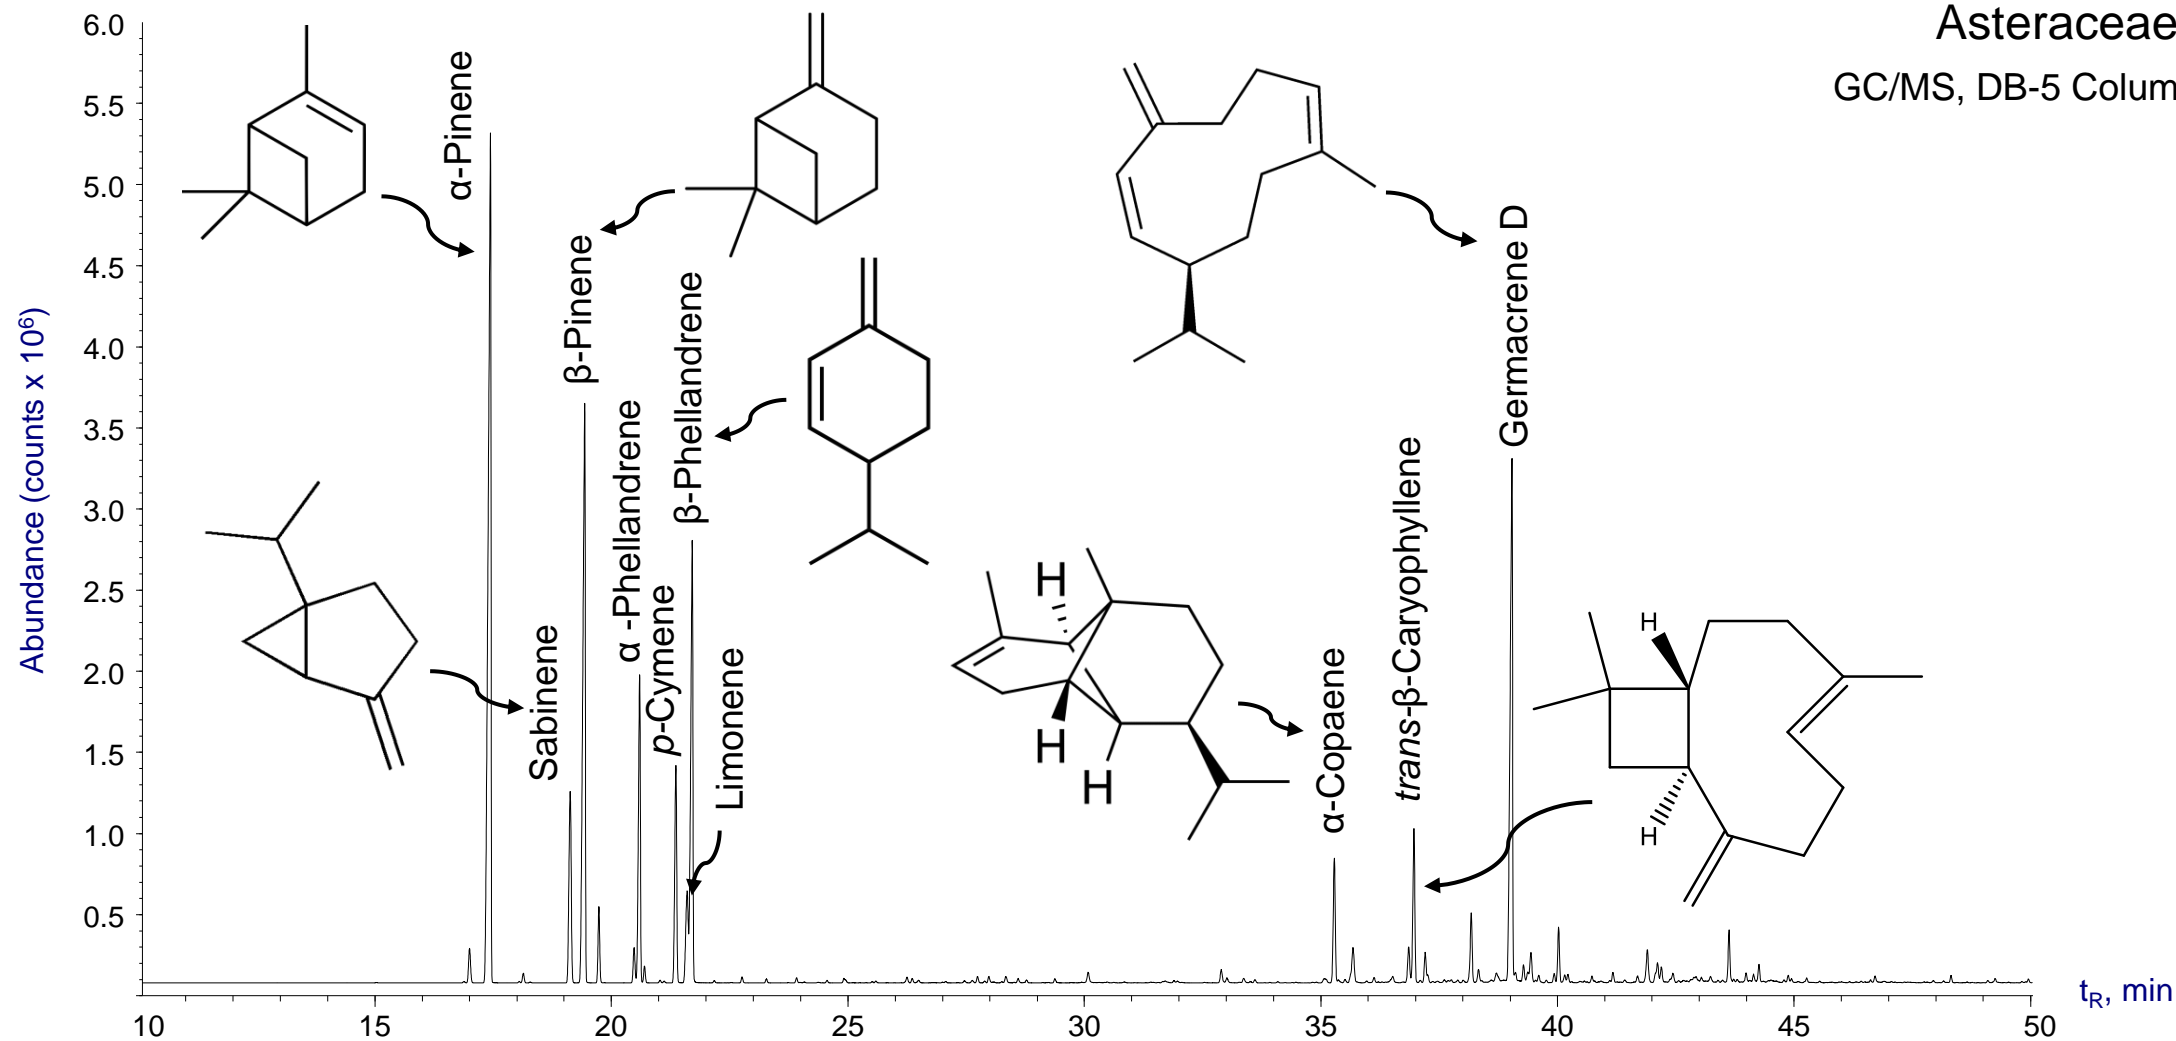

**Turnera diffusa Willd. ex Schult (Damiana) [TD]**

Passifloraceae family

DB-5 Column (60 m)

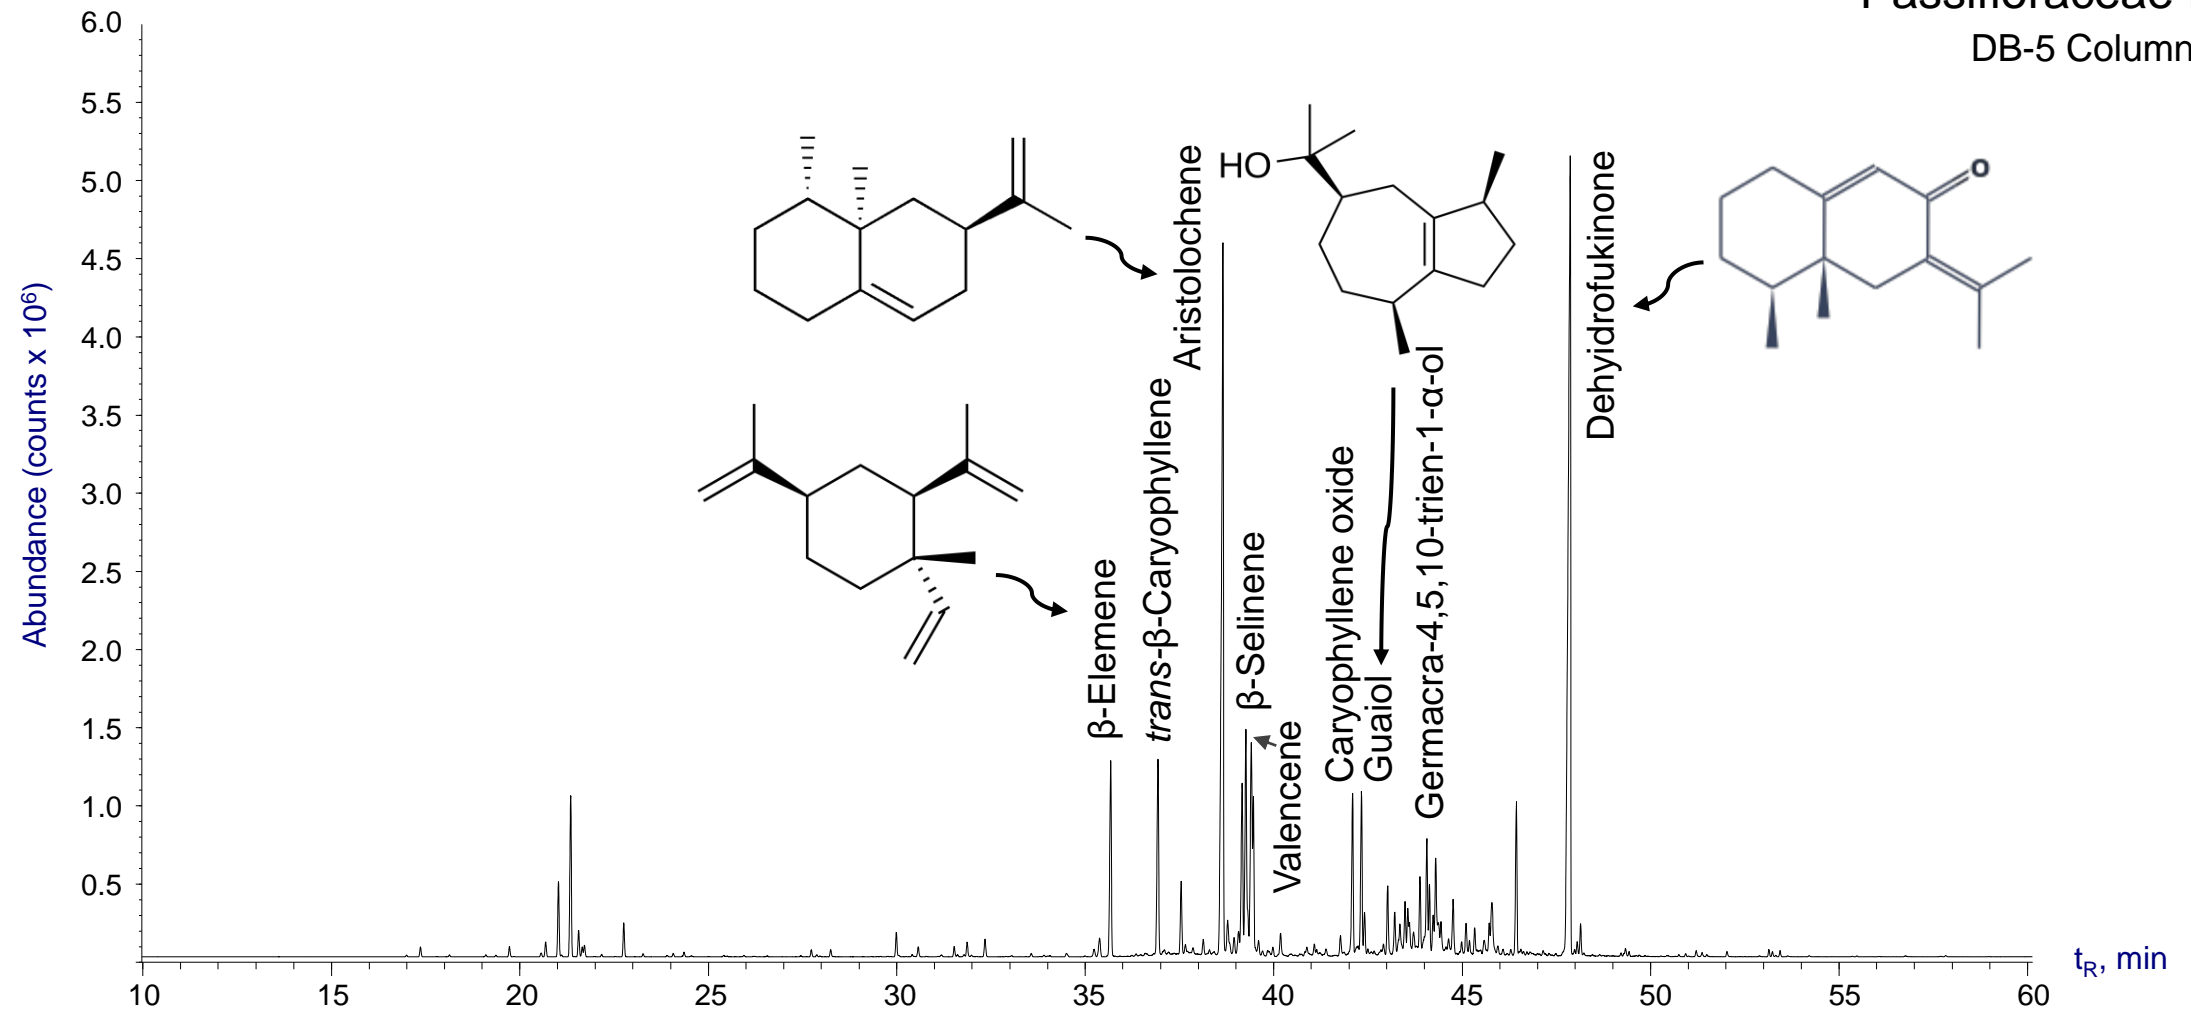

***Calycolpus moritzianus* (O. Berg) Burret [CM]**

Myrtaceae family

GC/MS, DB-5 Column (60 m)

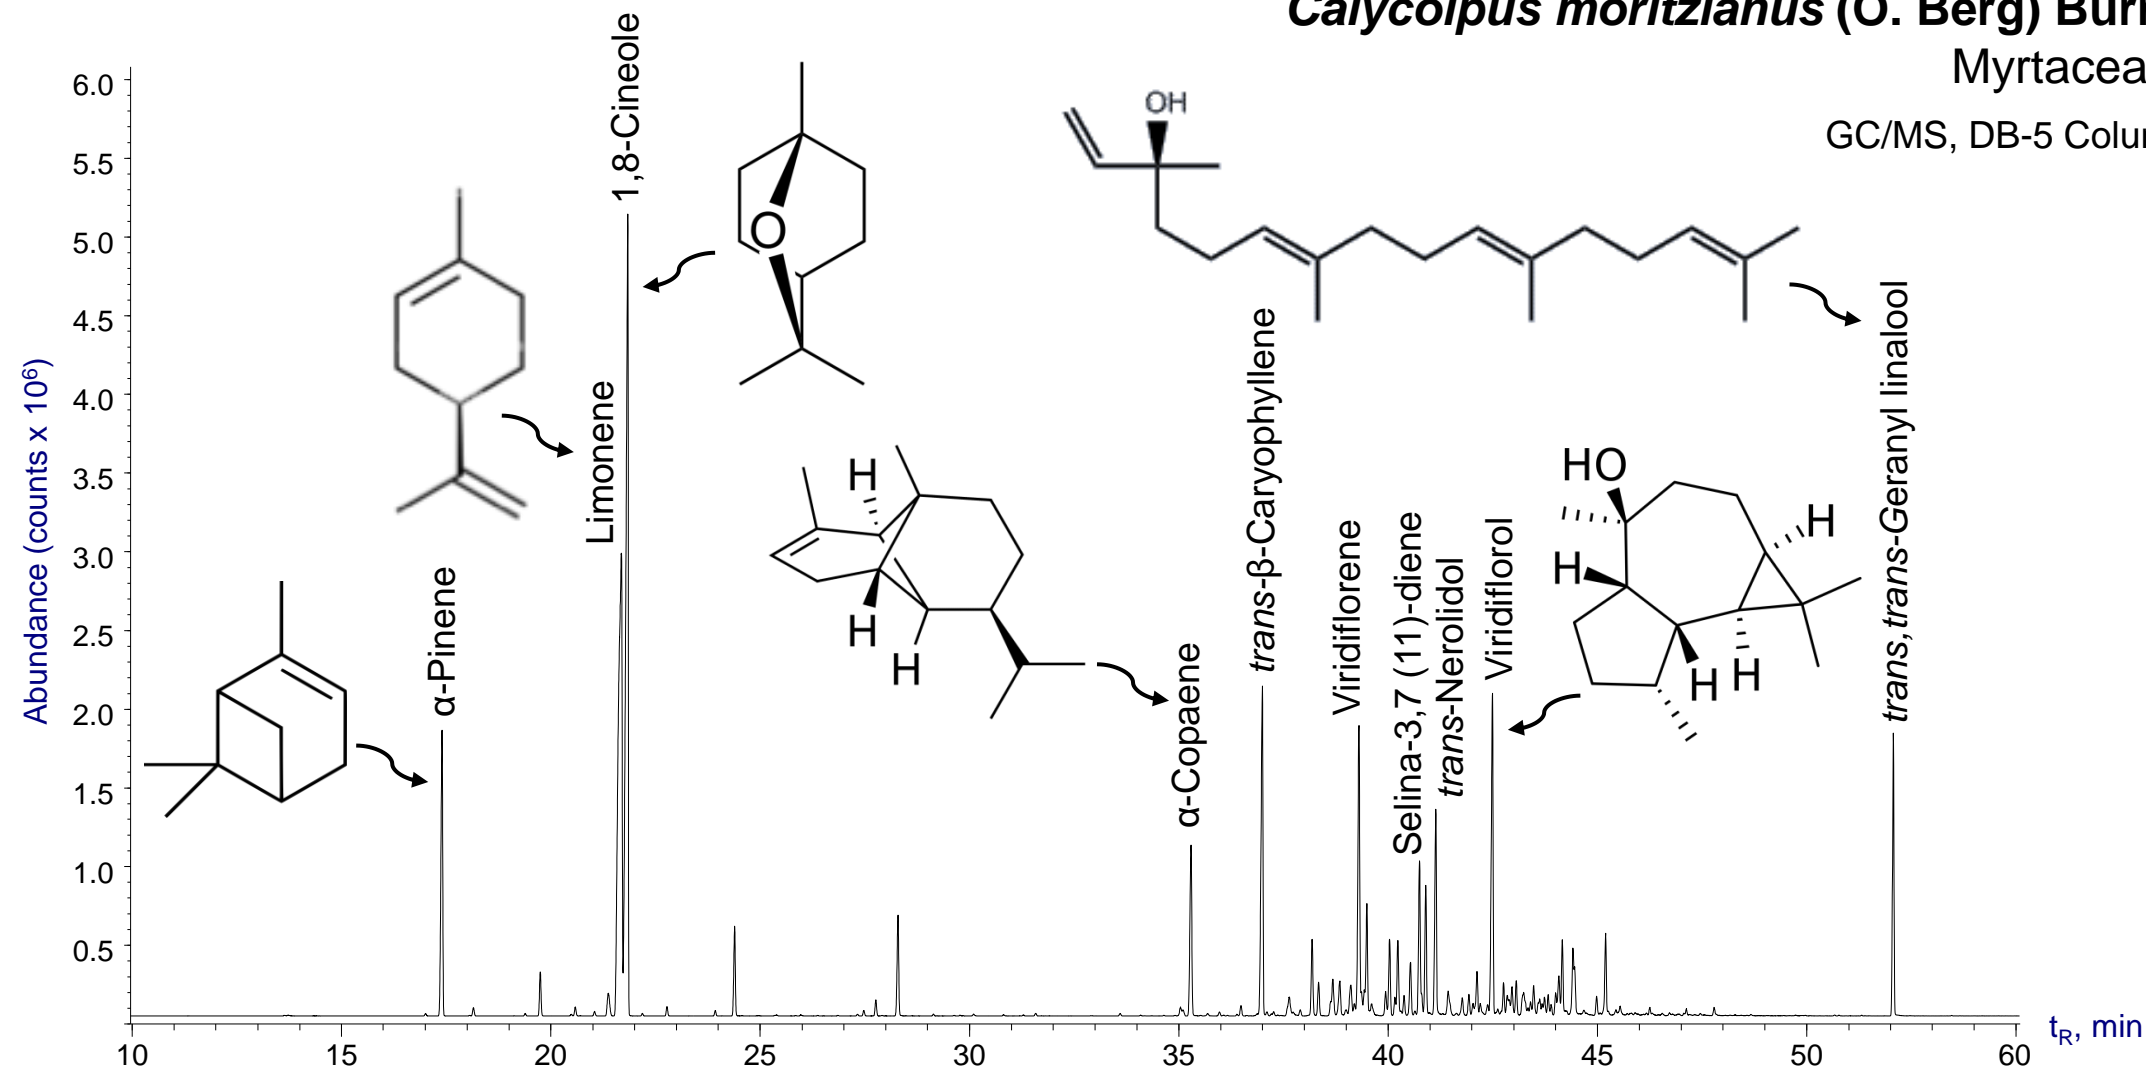

***Piper aduncum* L. [PA]**

Piperaceae family

GC/MS/ DB-5 Column (60 m)

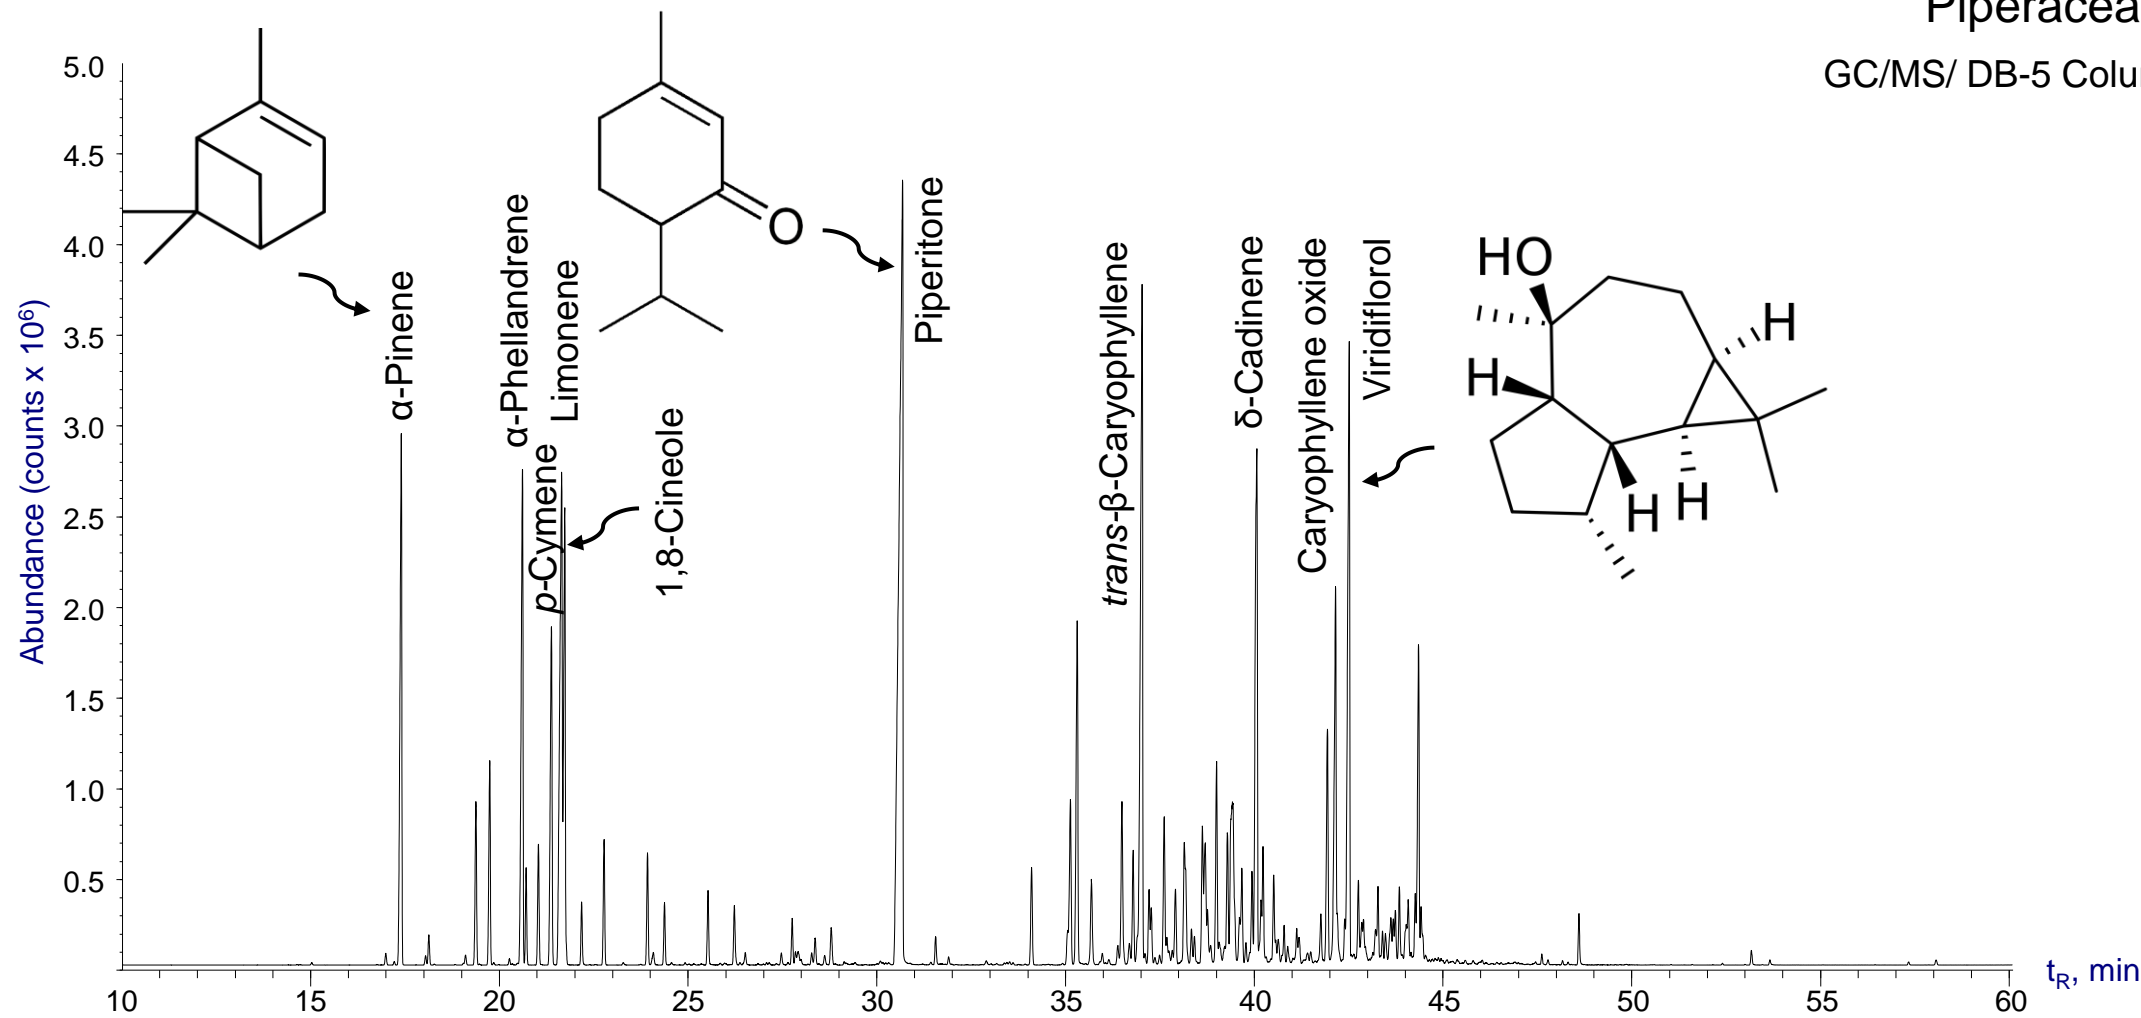

***Elaphandra quinquenervis* (S.F. Blake) H. Rob [EQ]**

Asteraceae family

GC/MS, DB-5 Column (60 m)

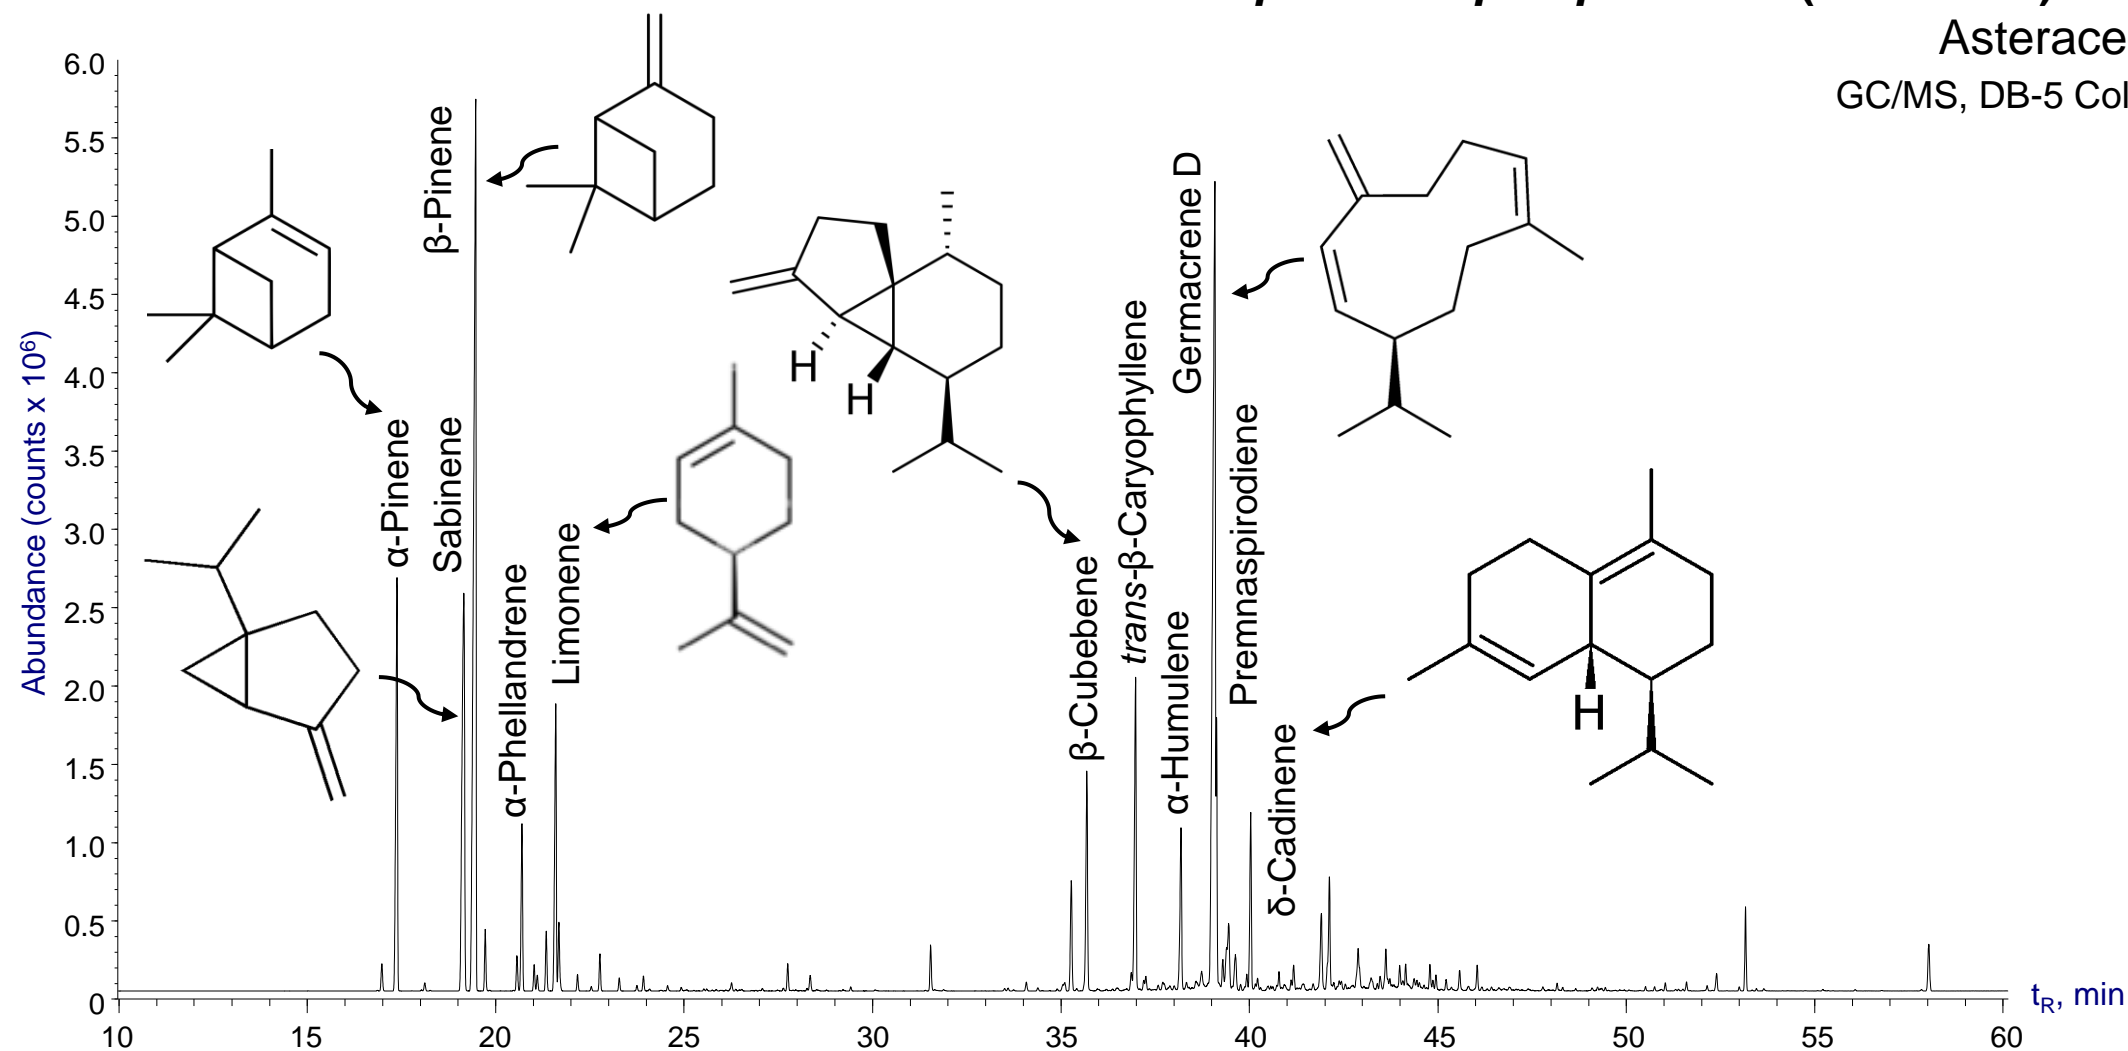



***Hyptis dilatata* Benth [HD]**

Lamiaceae family

GC/MS, DB-5 Column (60 m)

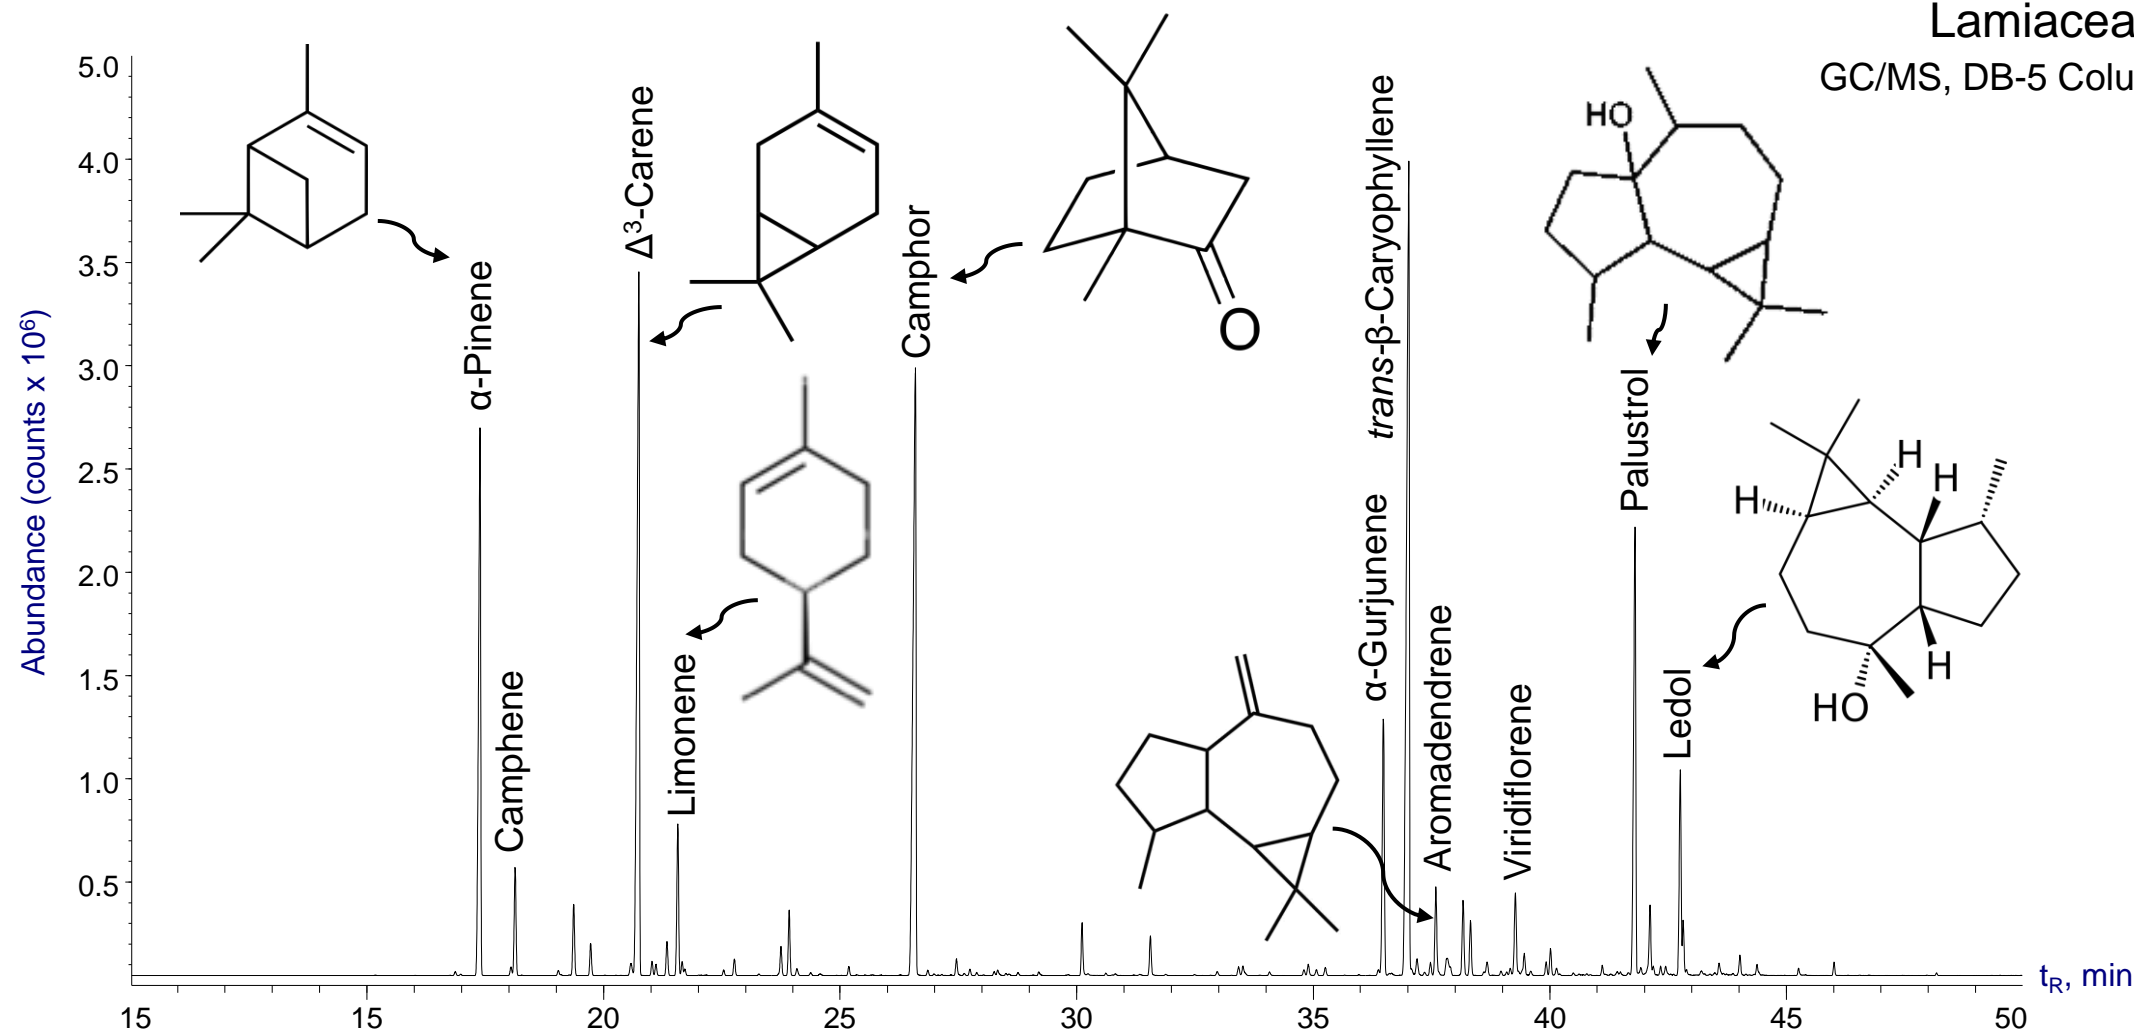

**Satureja viminea L. [SV]**

Lamiaceae family

GC/MS, DB-5 Column (60 m)

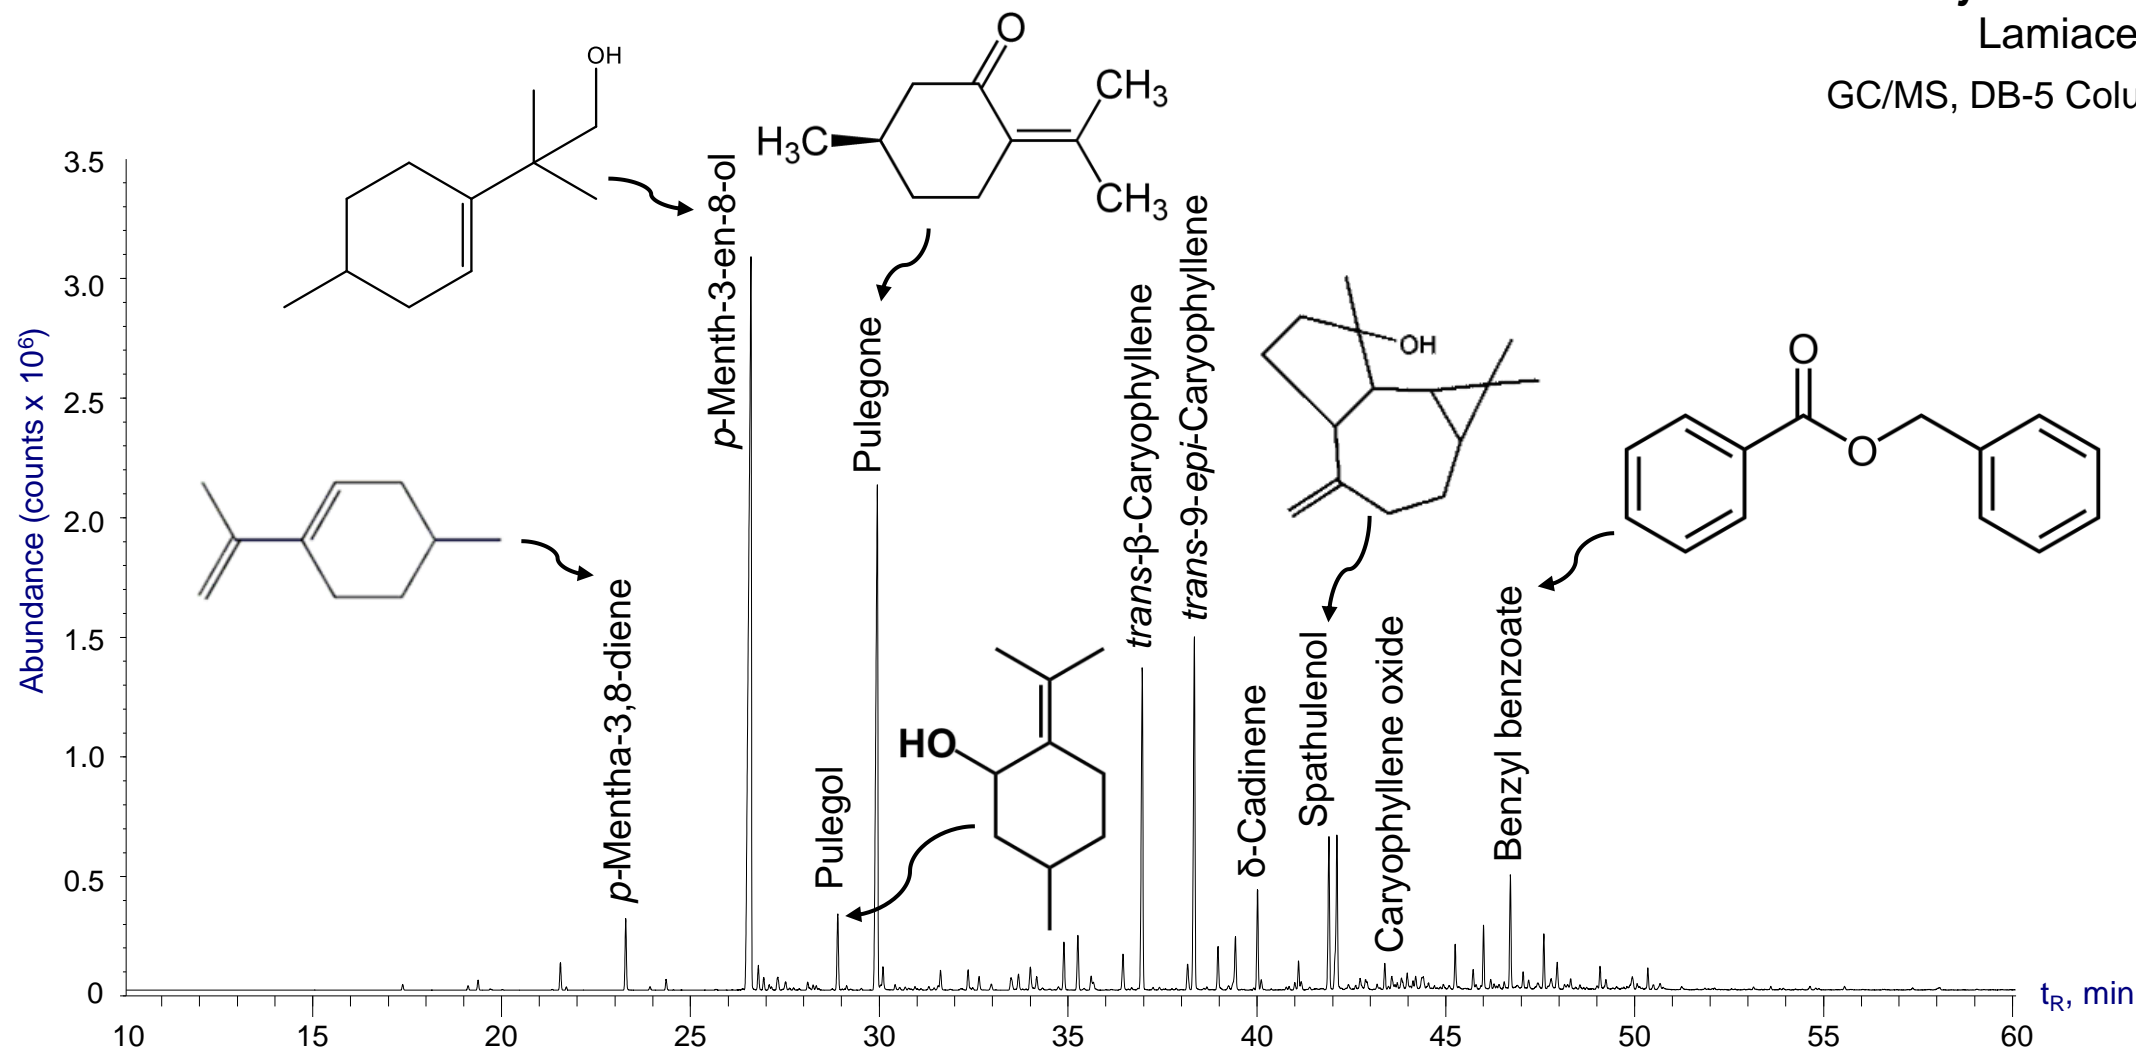

***Psidium sartorianum* (O.Berg) Burret [PS]**

Myrtaceae family

GC/MS, DB-WAX Column (60 m)

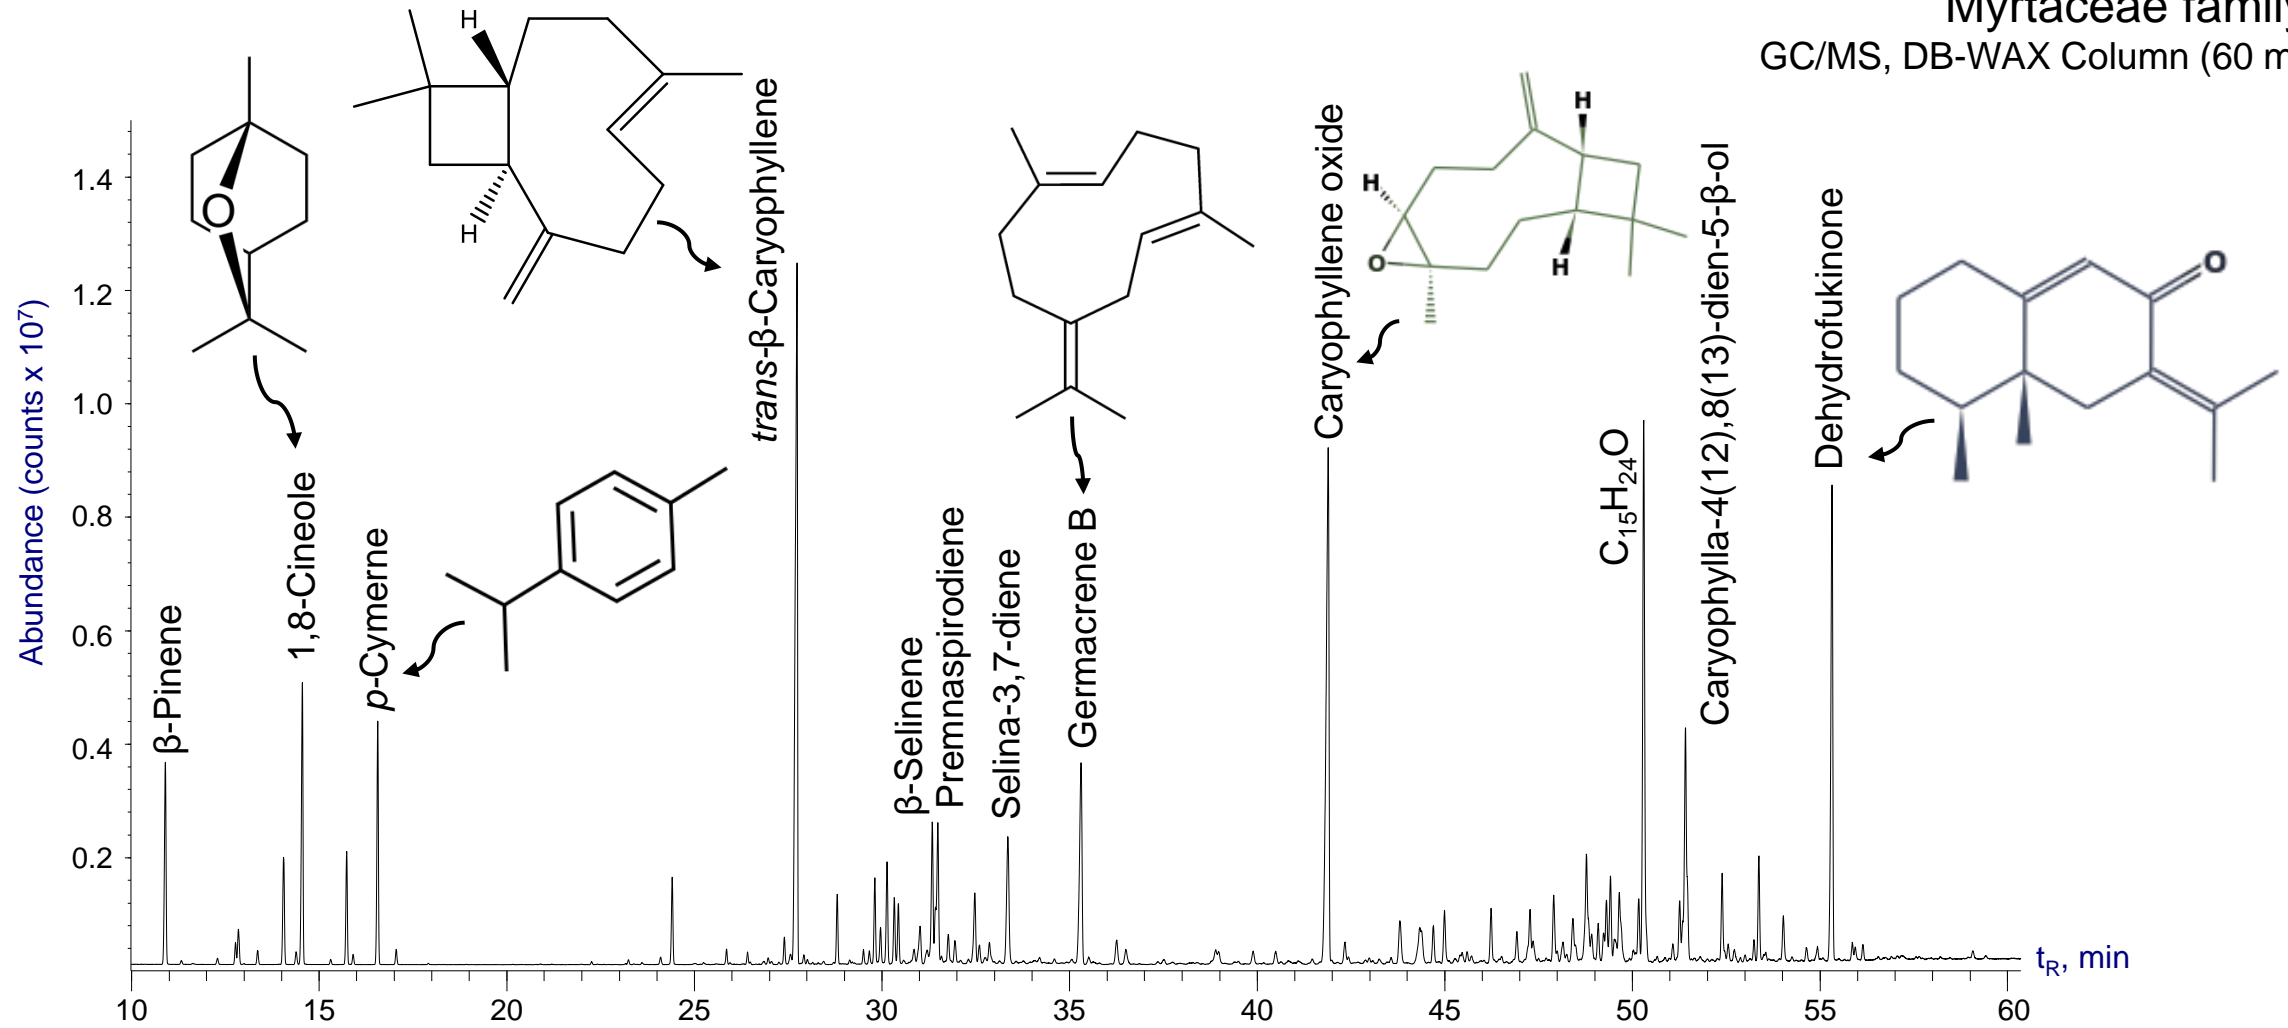

***Varronia curassavica* Jacq. [VC]**

Boraginaceae family

GC/MS, DB-5 Column (60 m)

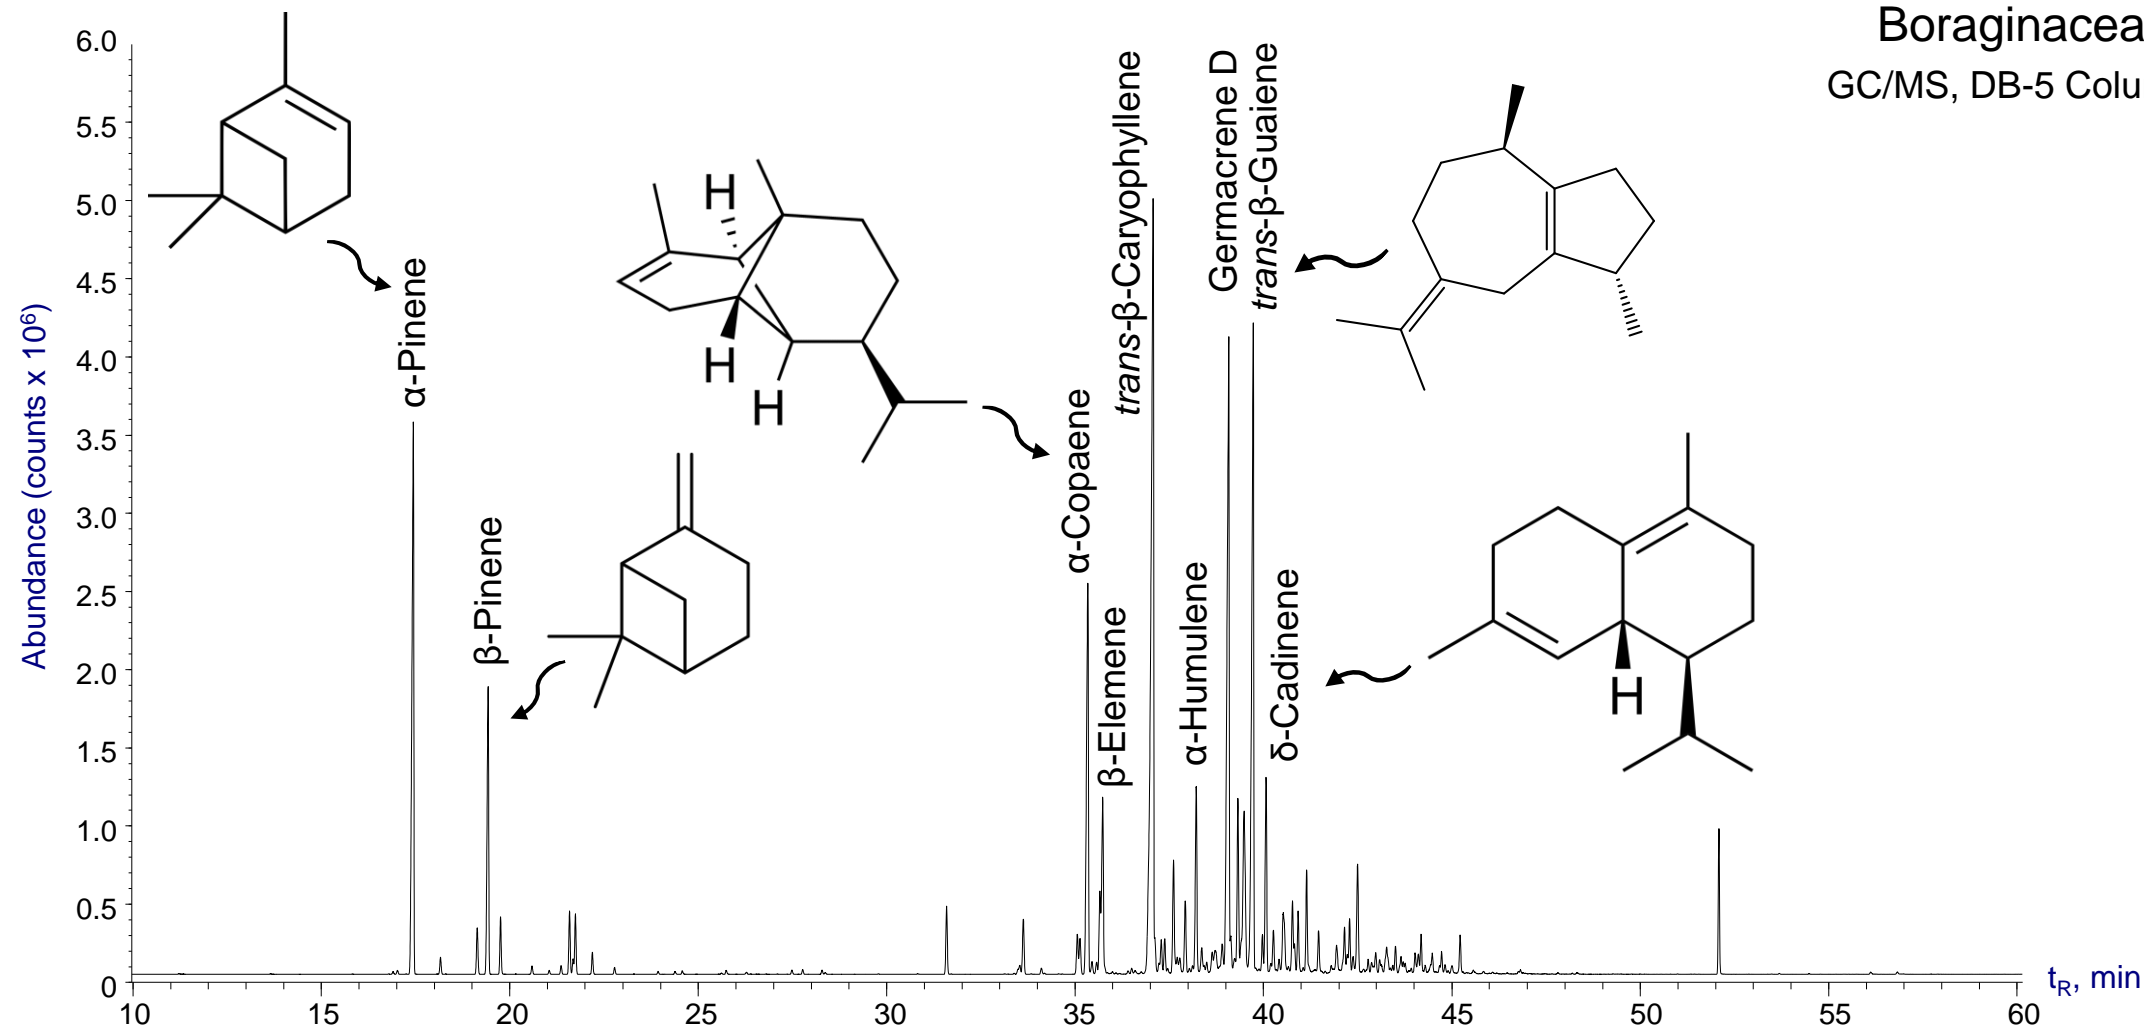



***Ocimum basilicum* L. [OB]**

Lamiaceae family

GC/MS, DB-5 Column (60 m)

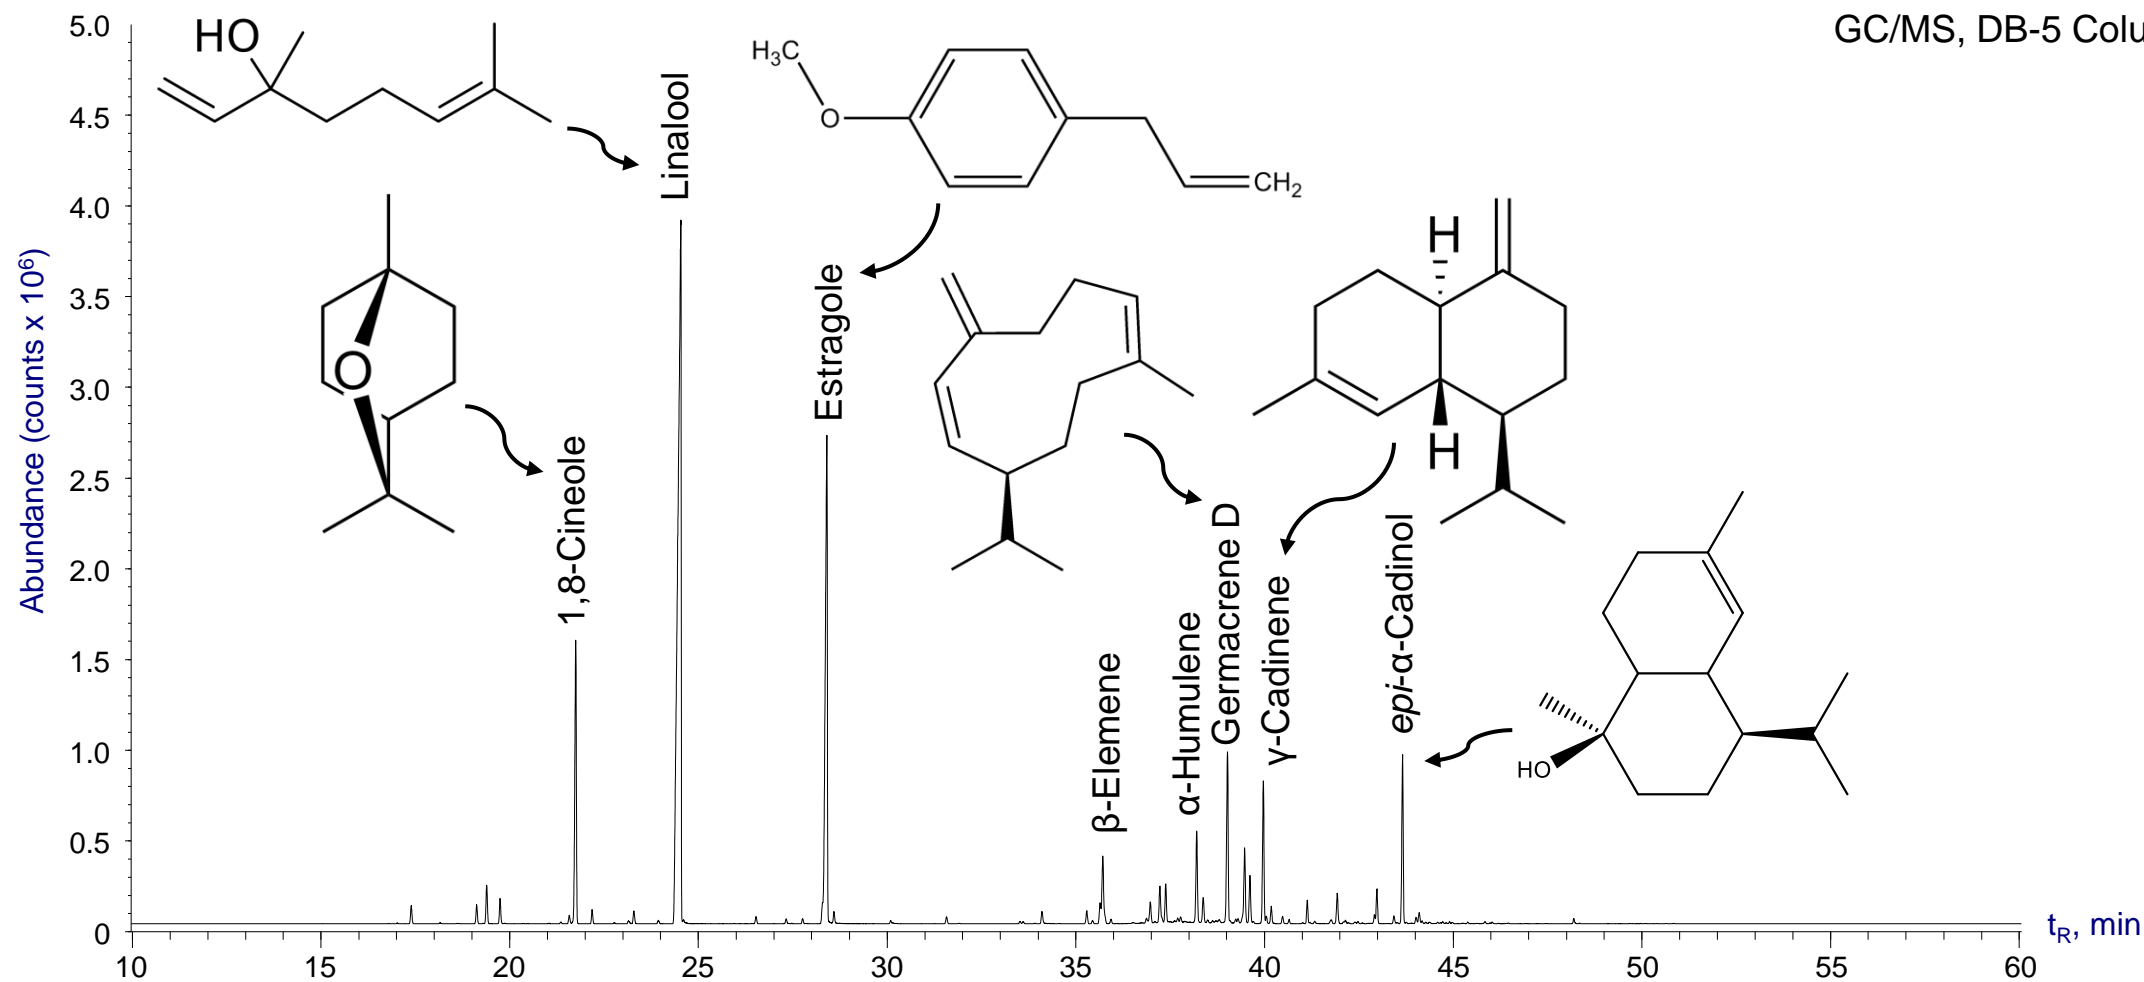

***Lippia origanoides* Kunth [LO]**

[Thymol chemotype]

Verbenaceae family

GC/MS, DB-5 Column (60 m)

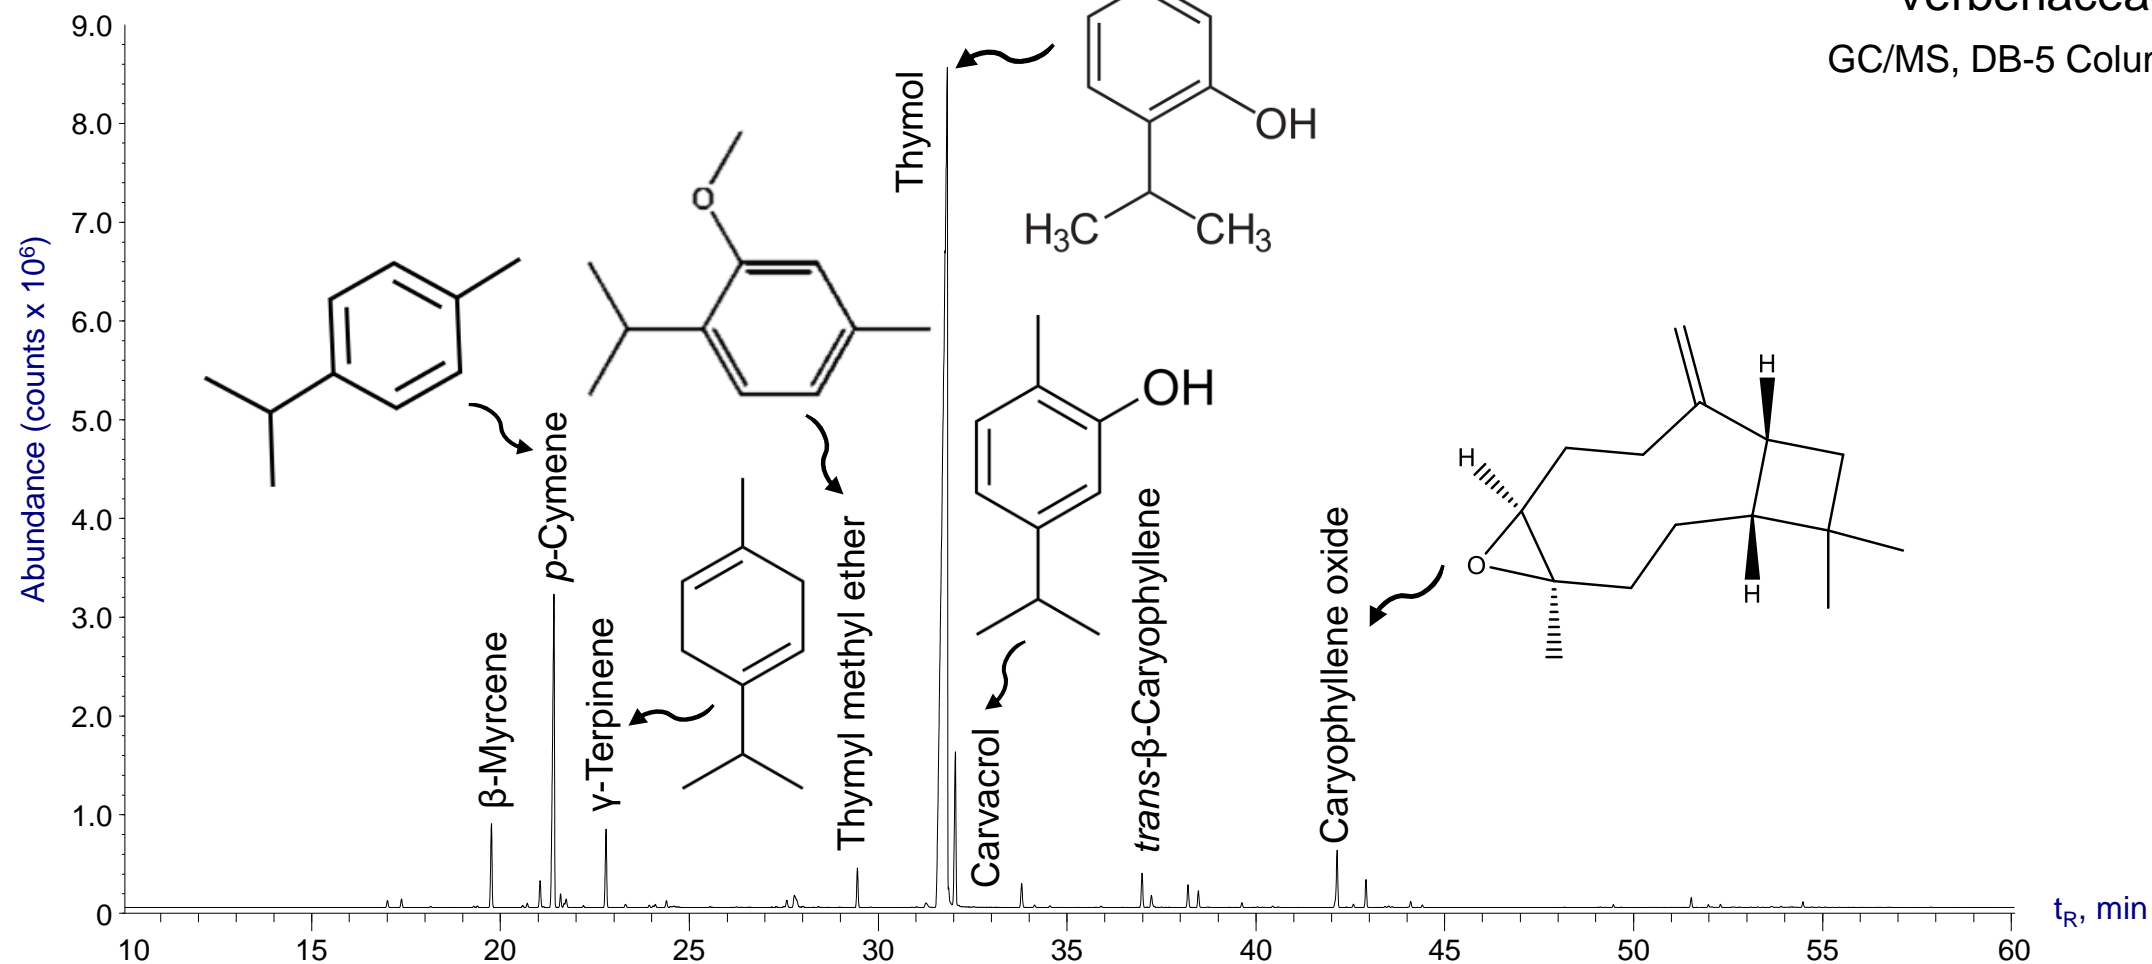

***Lippia micromera* Schauer [LM]**

Verbenaceae family

GC/MS, DB-5 Column (60 m)

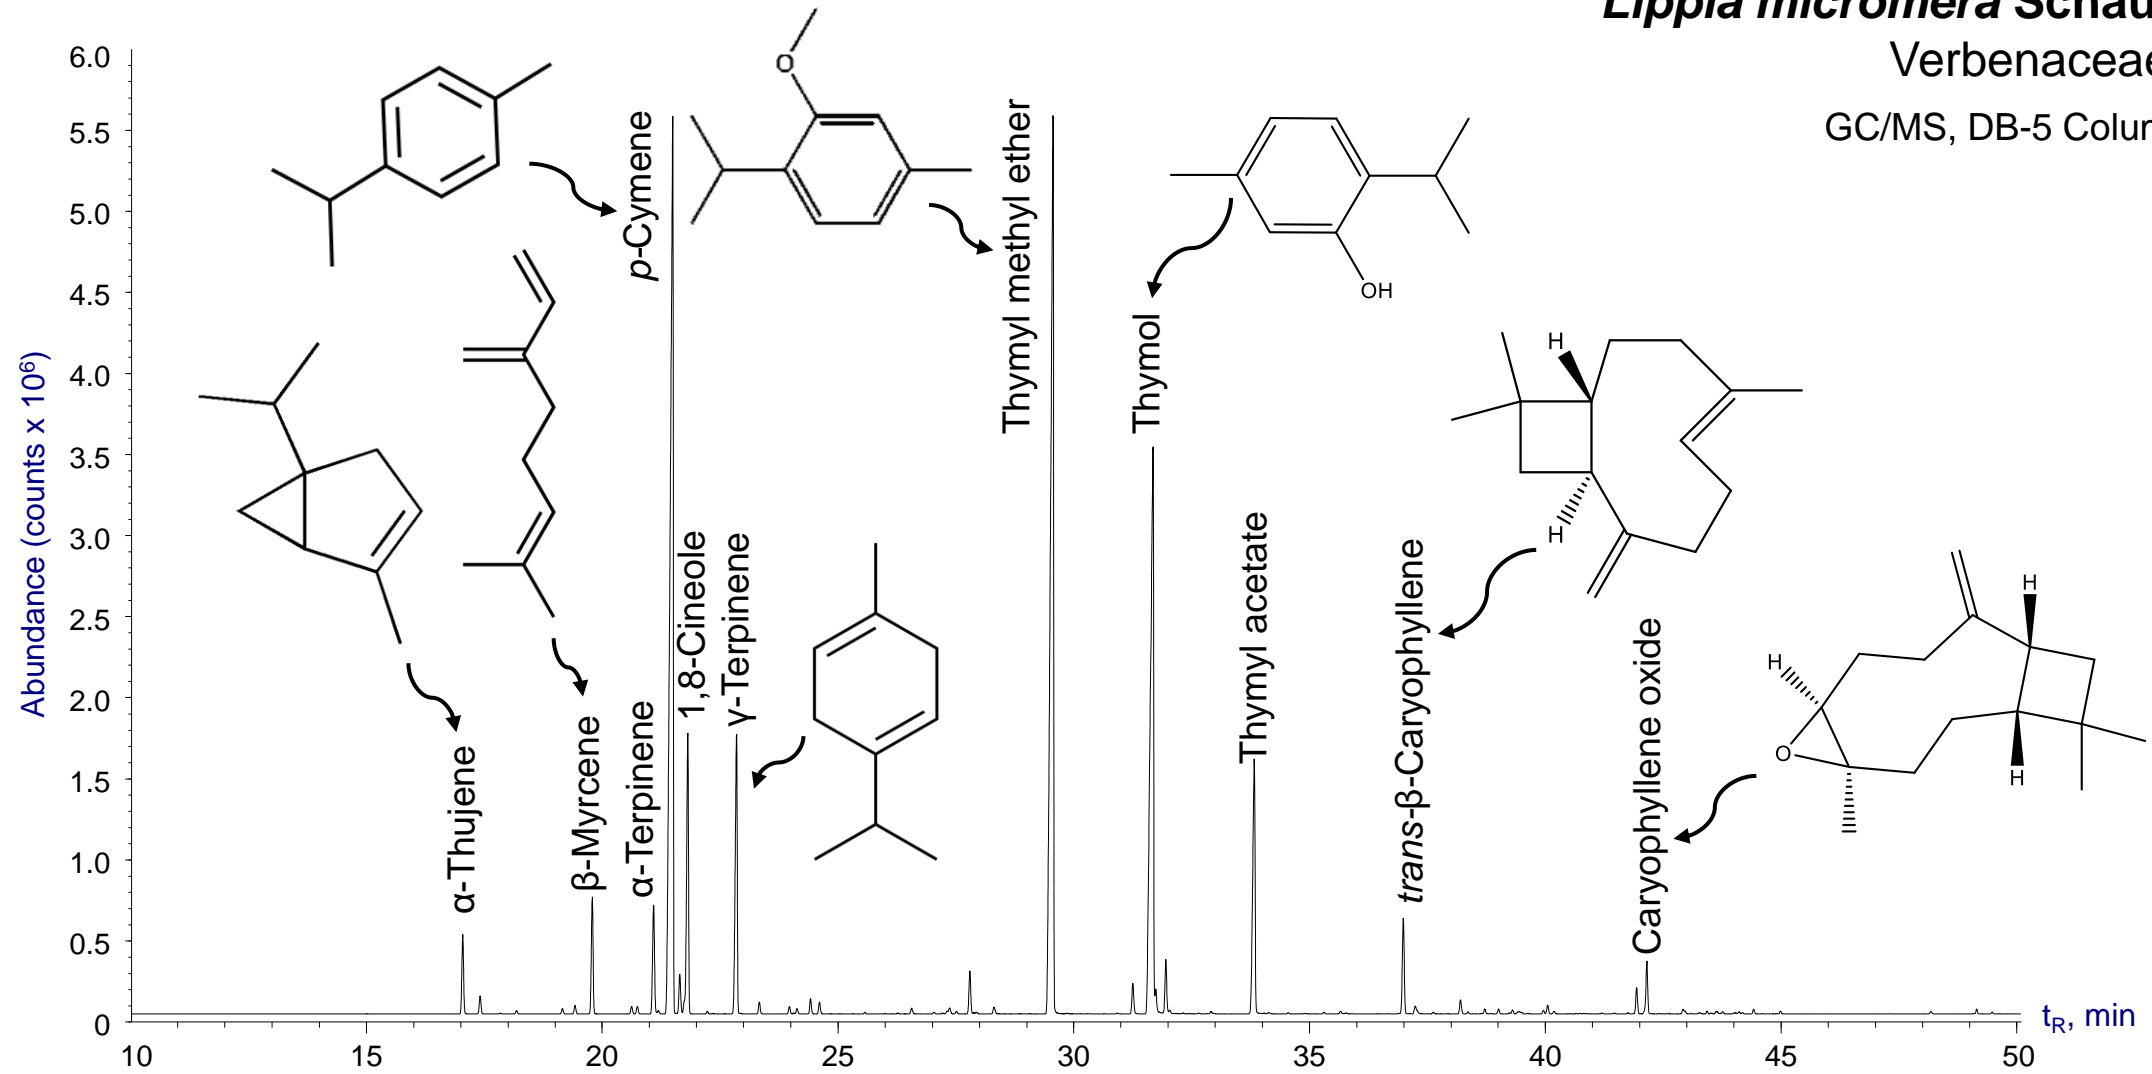

***Piper reticulatum* L. [PR]**

Piperaceae family

GC/MS, DB-5 Column (60 m)

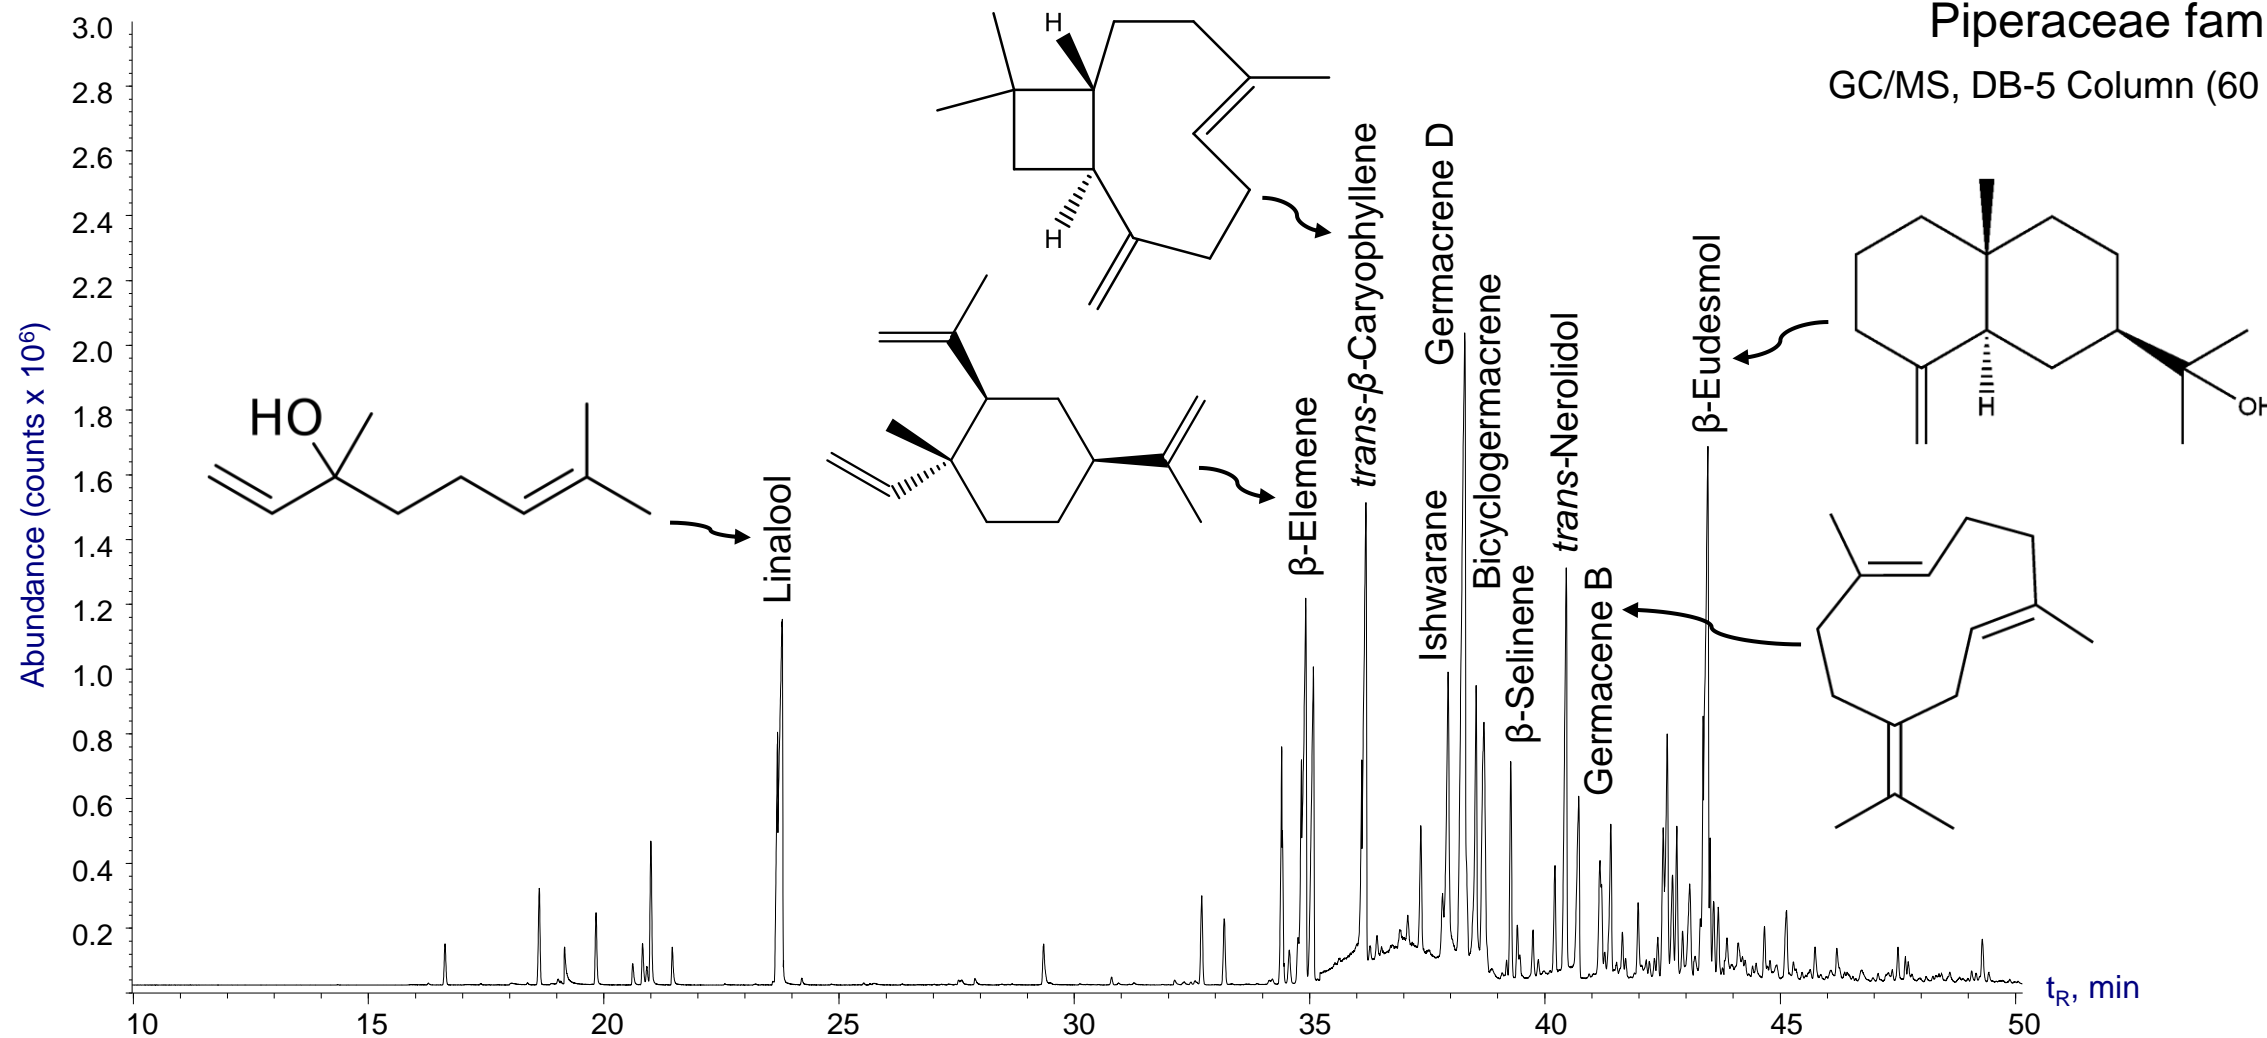



***Ageratina popayanensis* (Hieron.) R. King & H. Rob. [AP]**

Asteraceae family

GC/MS, DB-5 Column (60 m)

[Istd] – *n*-Tetradecane

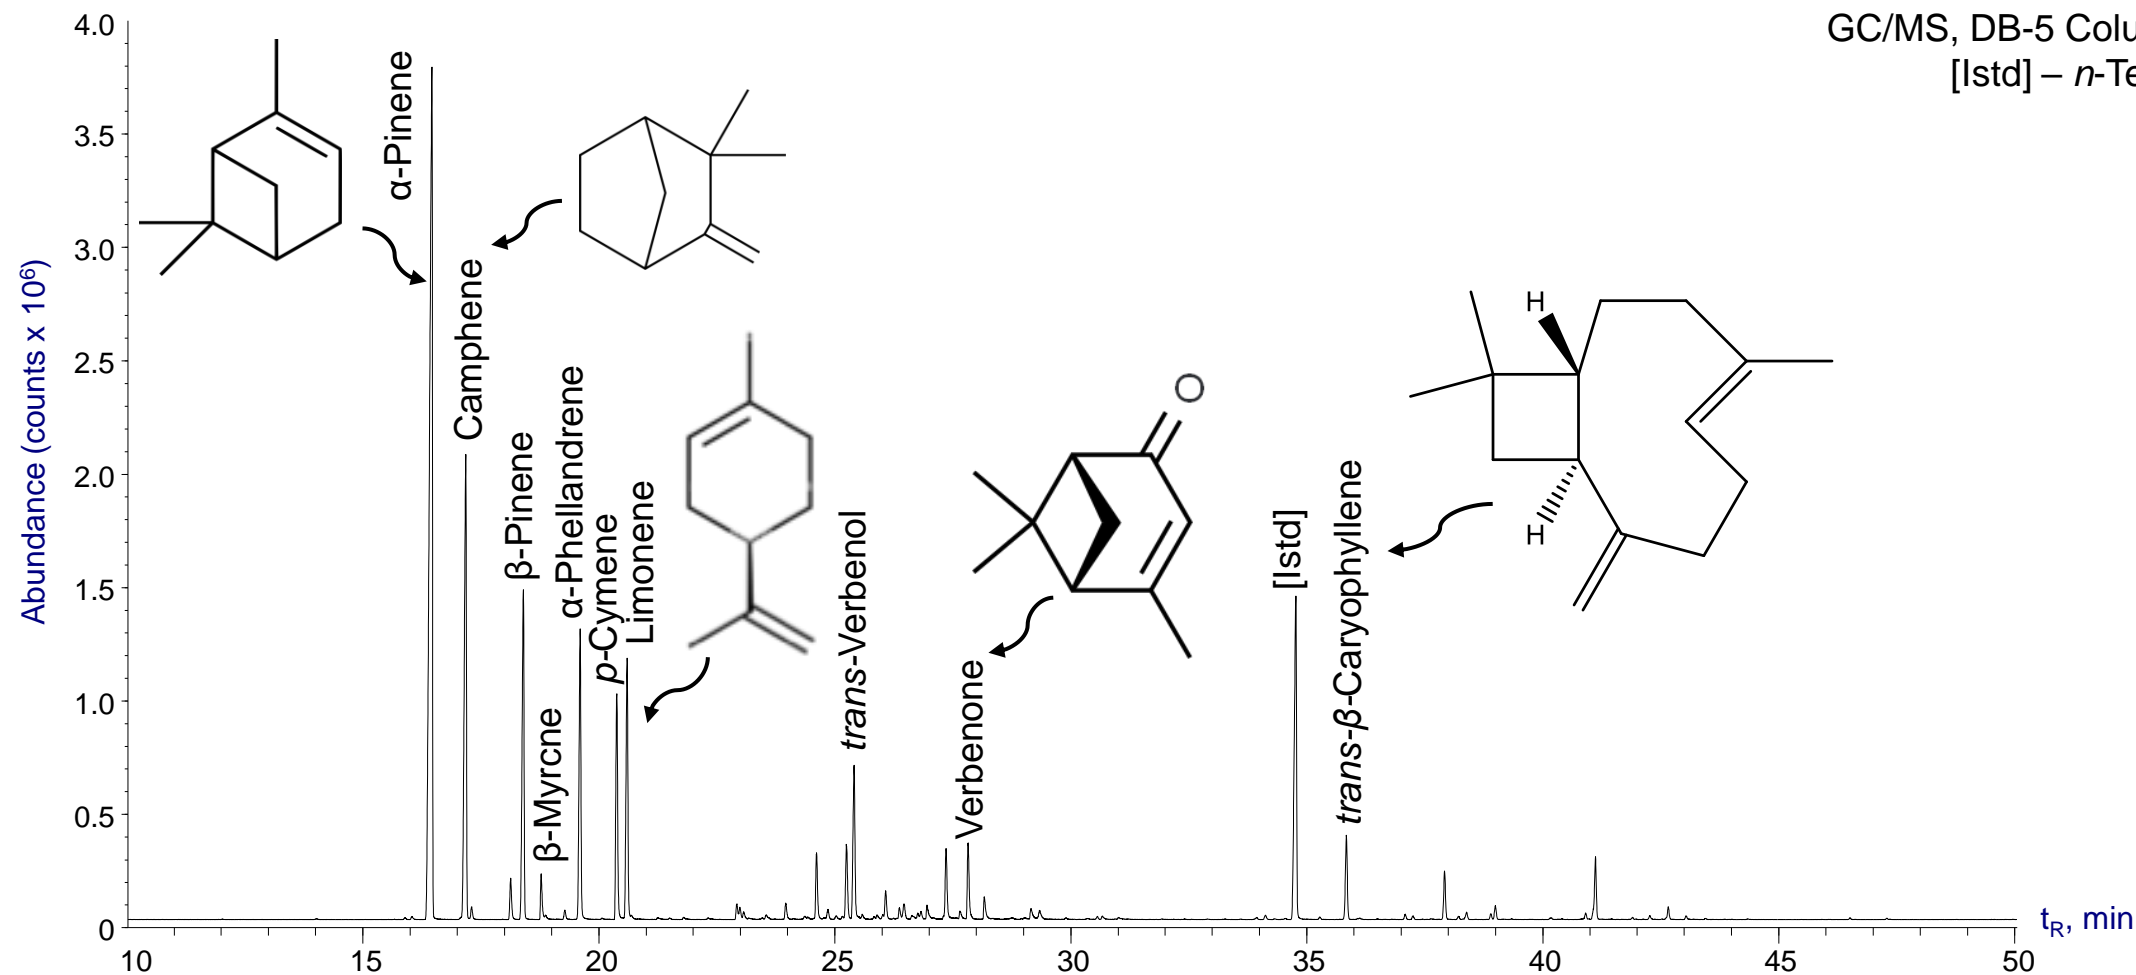

***Ocimum campechianum* Mill. [OC]**

Lamiaceae family

GC/MS, DB-5 Column (60 m)

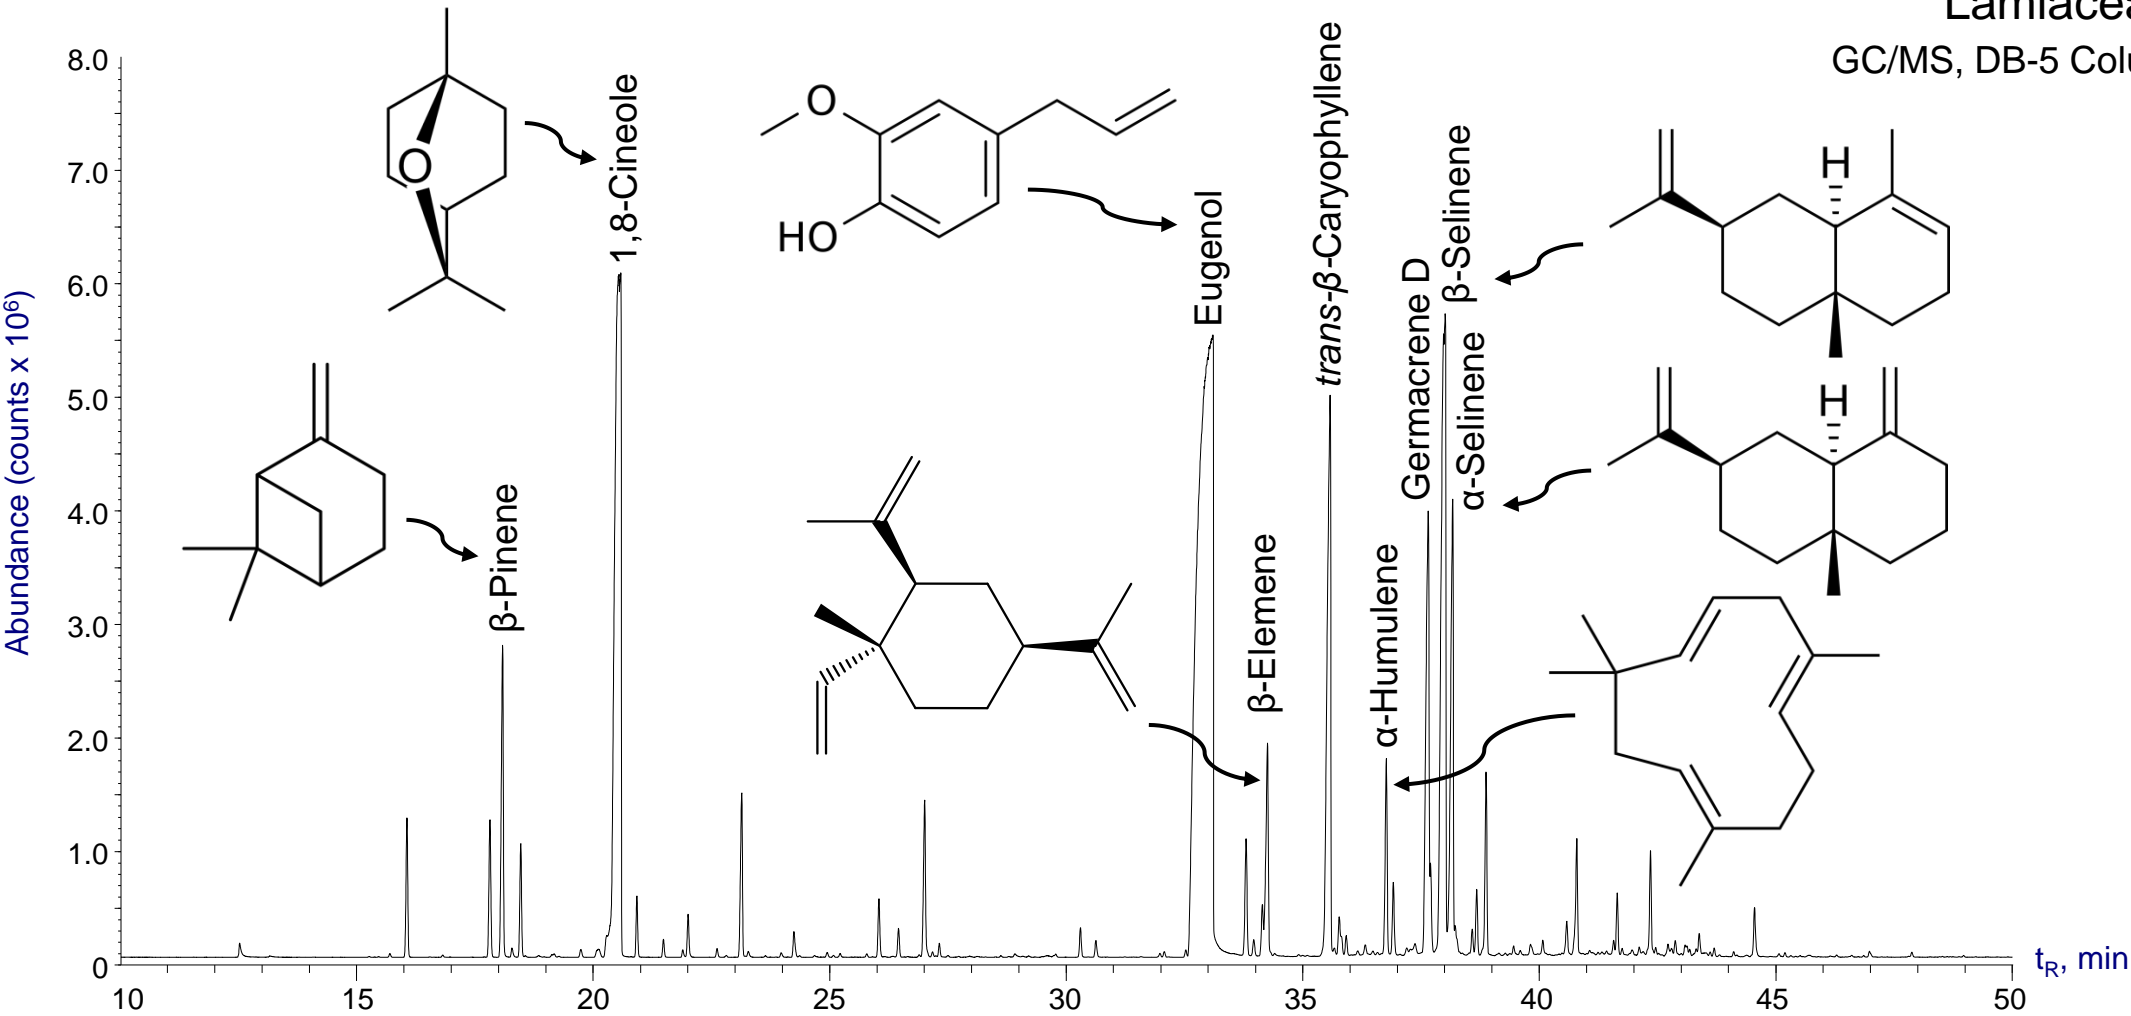

Supplement: s1 [file s1]
