# Supplementary material for: Metabolomic Analysis of the Effect of Lippia origanoides Essential Oil on the Inhibition of Quorum Sensing in Chromobacterium violaceum
Source: MDPI journal article supplement (doi:10.3390/antibiotics12050814), 2023-04-26
Supplement: s1 [file s1]

**Table S1.** Linear retention indices of the main essential oil components.

| Compound               | Linear retention indices |          |                    |          | Identification criteria |
|------------------------|--------------------------|----------|--------------------|----------|-------------------------|
|                        | Polar column*            |          | Non-polar column** |          |                         |
|                        | Exp.                     | Lit.     | Exp.               | Lit.     |                         |
| $\alpha$ -Thujene      | 929                      | 924 [1]  | 1026               | 1027 [2] | a, b                    |
| $\alpha$ -Pinene       | 937                      | 936 [2]  | 1022               | 1025 [2] | a, b, c                 |
| Camphene               | 953                      | 950 [2]  | 1067               | 1068 [2] | a, b, c                 |
| Sabinene               | 976                      | 973 [2]  | 1120               | 1122 [2] | a, b, c                 |
| $\beta$ -Pinene        | 980                      | 978 [2]  | 1108               | 1110 [2] | a, b                    |
| $\beta$ -Myrcene       | 990                      | 989 [2]  | 1160               | 1161 [2] | a, b, c                 |
| $\alpha$ -Phellandrene | 1008                     | 1004 [2] | 1164               | 1168 [2] | a, b, c                 |
| $\Delta^3$ -Carene     | 1012                     | 1011 [2] | 1146               | 1147 [2] | a, b                    |
| $\alpha$ -Terpinene    | 1021                     | 1017 [2] | 1177               | 1178 [2] | a, b, c                 |
| p-Cymene               | 1026                     | 1024 [2] | 1268               | 1270 [2] | a, b, c                 |
| Limonene               | 1032                     | 1030 [2] | 1197               | 1198 [2] | a, b, c                 |
| $\beta$ -Phellandrene  | 1036                     | 1030 [2] | 1205               | 1209 [2] | a, b                    |
| 1,8-Cineole            | 1037                     | 1032 [2] | 1210               | 1211 [2] | a, b, c                 |
| $\gamma$ -Terpinene    | 1062                     | 1060 [2] | 1243               | 1245 [2] | a, b, c                 |
| p-Mentha-3,8-diene     | 1073                     | 1068 [1] | 1264               | 1271 [3] | a, b                    |
| Linalool               | 1103                     | 1099 [2] | 1543               | 1543 [2] | a, b, c                 |
| trans-Verbenol         | 1150                     | 1144 [2] | 1678               | 1680 [2] | a, b                    |
| Camphor                | 1156                     | 1143 [2] | 1519               | 1515 [2] | a, b                    |
| p-Menth-3-en-8-ol      | 1156                     | 1145 [1] | 1611               | 1600 [3] | a, b                    |
| Terpinen-4-ol          | 1187                     | 1177 [2] | 1608               | 1601 [2] | a, b, c                 |
| Estragole              | 1203                     | 1196 [2] | 1665               | 1671 [2] | a, b, c                 |
| Verbenone              | 1213                     | 1206 [2] | 1708               | 1721 [2] | a, b                    |
| trans-Pulegol          | 1216                     | 1213 [1] | 1722               | -        | a, b                    |
| Thymyl methyl ether    | 1234                     | 1234 [2] | 1590               | 1587 [2] | a, b                    |
| Pulegone               | 1245                     | 1234 [2] | 1651               | 1654 [2] | a, b                    |
| Piperitone             | 1264                     | 1264 [3] | 1738               | 1730 [2] | a, b                    |
| Thymol                 | 1292                     | 1290 [2] | 2165               | 2164 [2] | a, b, c                 |
| Carvacrol              | 1302                     | 1300 [2] | 2192               | 2211 [2] | a, b, c                 |
| Thymyl acetate         | 1348                     | 1356 [2] | 1860               | 1867 [2] | a, b                    |
| Eugenol                | 1365                     | 1358 [2] | 2171               | 2163 [2] | a, b, c                 |
| $\alpha$ -Copaene      | 1387                     | 1376 [2] | 1497               | 1491 [2] | a, b                    |
| $\beta$ -Cubebene      | 1396                     | 1387 [1] | 1543               | 1542 [2] | a, b                    |
| $\beta$ -Elemene       | 1396                     | 1390 [2] | 1592               | 1591 [2] | a, b                    |
| $\alpha$ -Gurjunene    | 1419                     | 1409 [1] | 1536               | 1529 [2] | a, b                    |

| Compound                            | Linear retention indices |          |                    |          | Identification criteria |
|-------------------------------------|--------------------------|----------|--------------------|----------|-------------------------|
|                                     | Polar column*            |          | Non-polar column** |          |                         |
|                                     | Exp.                     | Lit.     | Exp.               | Lit.     |                         |
| trans-β-Caryophyllene               | 1432                     | 1420 [2] | 1600               | 1598 [2] | a, b, c                 |
| Aromadendrene                       | 1452                     | 1441 [2] | 1614               | 1620 [2] | a, b, c                 |
| α-Humulene                          | 1469                     | 1468 [3] | 1674               | 1667 [2] | a, b, c                 |
| Aristolochene                       | 1483                     | 1487 [1] | 1687               | 1697 [4] | a, b                    |
| Ishwarane                           | 1486                     | 1465 [1] | 1653               | 1636 [3] | a, b                    |
| Germacrene D                        | 1494                     | 1481 [2] | 1710               | 1708 [2] | a, b, c                 |
| Premnaspirodiene                    | 1501                     | 1505 [1] | 1725               | -        | a, b                    |
| β-Selinene                          | 1502                     | 1489 [1] | 1722               | 1717 [2] | a, b                    |
| Viridiflorene                       | 1502                     | 1496 [1] | 1700               | 1696 [2] | a, b                    |
| Valencene                           | 1507                     | 1496 [1] | 1713               | 1729 [2] | a, b                    |
| Bicyclogermacrene                   | 1509                     | 1500 [1] | 1735               | 1734 [2] | a, b                    |
| α-Selinene                          | 1509                     | 1498 [1] | 1737               | 1725 [2] | a,b                     |
| trans-β-Guaiene                     | 1517                     | 1502 [1] | -                  | -        | a, b                    |
| γ-Cadinene                          | 1525                     | 1513 [1] | 1763               | 1763 [2] | a, b                    |
| δ-Cadinene                          | 1526                     | 1523 [2] | 1754               | 1756 [2] | a, b                    |
| Selina-3,7(11)-diene                | 1550                     | 1545 [1] | 1780               | 1783 [2] | a, b                    |
| trans-Nerolidol                     | 1564                     | 1561 [1] | 2036               | 2036 [2] | a, b, c                 |
| Germacrene B                        | 1574                     | 1559 [1] | 1828               | 1824 [2] | a, b                    |
| Palustrol                           | 1586                     | 1567 [1] | 1930               | 1930 [2] | a, b                    |
| Spathulenol                         | 1590                     | 1577 [1] | 2116               | 2127 [2] | a, b                    |
| Caryophyllene oxide                 | 1596                     | 1582 [1] | 1981               | 1986 [2] | a, b, c                 |
| Guaiol                              | 1606                     | 1600 [1] | 2085               | 2089 [2] | a, b, c                 |
| Viridiflorol                        | 1611                     | 1592 [1] | 2080               | 2090 [2] | a, b                    |
| Ledol                               | 1621                     | 1612 [3] | 2026               | 2039 [2] | a, b                    |
| Humulene epoxide II                 | 1627                     | 1608 [1] | 2036               | 2047 [2] | a, b                    |
| Caryophylla-4(12),8(13)-dien-5-β-ol | 1653                     | 1639 [1] | 2287               | -        | a, b                    |
| β-Eudesmol                          | 1665                     | 1650 [2] | 2224               | 2238 [2] | a, b, c                 |
| Germacra-4,5,10-trien-1-α-ol        | 1680                     | 1685 [1] | 2365               | -        | a, b                    |
| Benzyl benzoate                     | 1777                     | 1761 [2] | 2652               | 2652 [3] | a, b, c                 |
| Dehydrofukinone                     | 1827                     | 1808 [3] | 2448               | 2404 [3] | a, b                    |
| trans, trans-Geranyl-linalool       | 2027                     | 2026 [1] | -                  | 2551 [3] | a, b                    |

Compounds listed in order of elution from the non-polar column.

Exp. – Experimental

Lit. - Literature.

\*DB-5MS column. \*\* DB-WAX column.

Identification criteria:

- a - Tentative identification based on linear retention indices
- b - Tentative identification based on mass spectra (EI, 70 eV)
- c - Confirmatory identification based on the use of standard compounds.

#### References:

- [55]. V. I. Babushok, P. J. Linstrom and I. G. Zenkevich (2011) Retention Indices for Frequently Reported Compounds of Plant Essential Oils, J. Phys. Chem. Ref. Data, 40, 043101. <https://doi.org/10.1063/1.3653552>.
- [66] R. P. Adams, (2007) Identification of essential oil components by gas chromatography/mass spectrometry. 4th ed., Allured Publ., Carol Stream, Illinois, EE. UU.,1-809. <https://doi.org/10.1016/j.jasms.2005.07.008>.
- [67] W. Wallace, (2017) NIST Standard Reference Database 1A. Version 2.3

**Table S2. Evaluation of the anti-QS activity of EOs against CV026**

| Essential oil                  | MQSIC (mg/mL) | Violacein Inhibition (%) |
|--------------------------------|---------------|--------------------------|
| <i>Steiractinia aspera</i>     | 3             | 17,6                     |
| <i>Turnera diffusa</i>         | 0,37          | 45,8                     |
| <i>Calycolpus moritzianus</i>  | 1,5           | 23,0                     |
| <i>Piper aduncum</i>           | 0,5           | 54,6                     |
| <i>Elephandra qinquenervis</i> | 3             | 11,5                     |
| <i>Hyptis dilatata</i>         | 0,37          | 53,2                     |
| <i>Satureja viminea</i>        | 0,75          | 32,2                     |
| <i>Psidium sartorianum</i>     | 1,5           | 28,7                     |
| <i>Ocimum campechianum</i>     | 1,5           | 34,6                     |
| <i>Ocimum basilicum</i>        | 0,18          | 85,2                     |
| <i>Lippia origanoides</i>      | 0,15          | 94,0                     |
| <i>Lippia micromera</i>        | 0,75          | 42,4                     |
| <i>Piper reticulatum</i>       | 0,37          | 32,5                     |
| <i>Ageratina popayanensis</i>  | 1,5           | 38,3                     |
| <i>Varronia curassavica</i>    | 0,25          | 72,1                     |

MQSIC: Minimal Quorum Sensing Inhibitory Concentration

**Table S3. Colony-forming units/mL of CV026 bacterial strain measured in the control and treated CV cells (with *L. organoides* EO)**

| Time<br>(h) | CFU/mL                  |                         |
|-------------|-------------------------|-------------------------|
|             | Control                 | Treated EO              |
| 0           | $7.5 \times 10^6 \pm 4$ | $7.6 \times 10^6 \pm 2$ |
| 24          | $9 \times 10^6 \pm 3$   | $9.2 \times 10^6 \pm 3$ |
